# Supplementary material for: Improved selectivity for Pb(ii) by sulfur, selenium and tellurium analogues of 1,8-anthraquinone-18-crown-5: synthesis, spectroscopy, X-ray crystallography and computational studies
Source: Royal Society of Chemistry journal article supplement (doi:10.1039/c5dt01305d), 2015-01-01
Supplement: c5dt01305d1.pdf [file c5dt01305d1.pdf]

*Dalton Transaction*  
*Supporting Information*

*May 2015*

Improved Selectivity for Pb(II) by Sulfur,  
Selenium and Tellurium Analogues of 1,8-  
Anthraquinone-18-Crown-5: Synthesis,  
Spectroscopy, X-ray Crystallography and  
Computational Studies

Kadarkaraisamy Mariappan<sup>\*</sup>, Madhubabu Alaparthi, Mariah Hoffman, Myriam Alcantar  
Rama, Vinothini Balasubramanian, Danielle M John, and Andrew G Sykes

**Contribution from the Department of Chemistry  
University of South Dakota, Vermillion, SD 57069**

*Dedicated to Professor Ajai Kumar Singh, Department of Chemistry at Indian Institute of  
Technology, Delhi, India*

<sup>\*</sup>To whom correspondence should be addressed: mkadarka@usd.edu

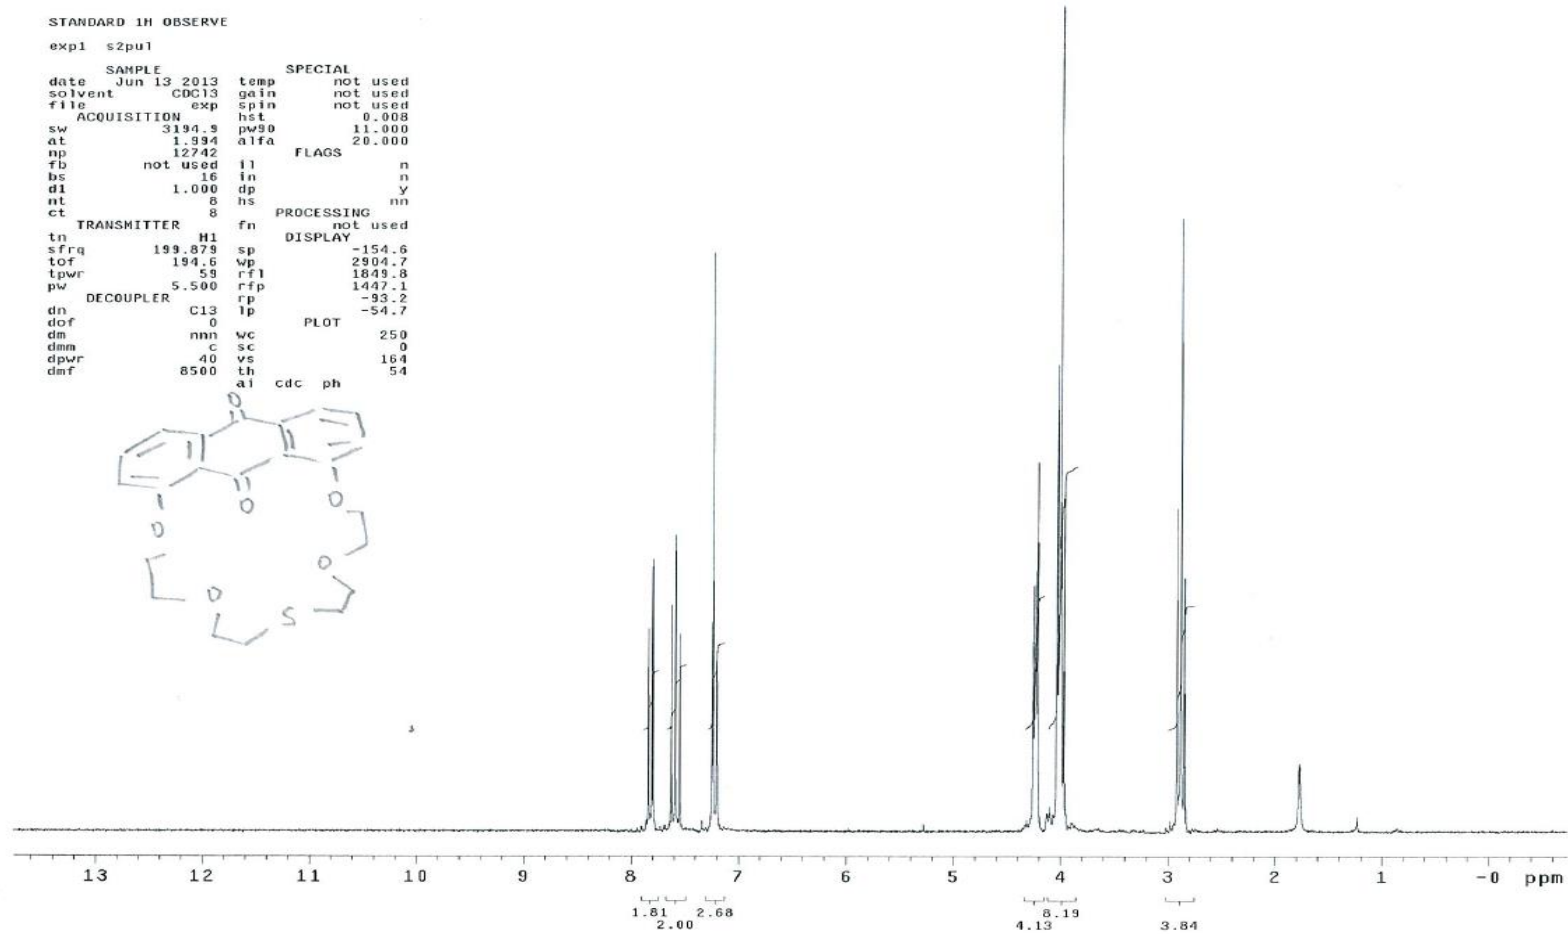

SI Fig. 1:  $^1\text{H}$  NMR of compound 2.

13C OBSERVE

exp1 52991

| SAMPLE      |             | SPECTRA    |          |
|-------------|-------------|------------|----------|
| date        | May 19 2010 | temp       | not used |
| solvent     | CDCl3       | gain       | not used |
| file        | exp         | spin       | not used |
| ACQUISITION |             | lat        | 0.000    |
| ac          | 12878.6     | pu80       | 13.000   |
| ac          | 1.486       | shra       | 20.000   |
| ap          | 57030       | FLAG       |          |
| fa          | not used    | li         | n        |
| ba          | 0.4         | ia         | n        |
| da          | 0.000       | da         | 5        |
| nt          | 512         | hc         | nn       |
| ct          | 512         | PROCESSING |          |
| TRANSMITTER |             | fa         | 1.00     |
| ta          | C13         | fa         | not used |
| efrq        | 50.280      | DISPLAY    |          |
| tof         | 0.00.7      | ap         | -0.00.0  |
| tpwr        | 0.0         | wp         | 112.07.0 |
| pw          | 0.700       | rfl        | 00.00.4  |
| DECOUPLER   |             | rfa        | 00.00.0  |
| da          | H1          | ra         | -100.0   |
| def         | 0           | fa         | -170.0   |
| da          | 0.00.0      | PLOT       |          |
| das         | 0.00.0      | mc         | 200      |
| dpr         | 0.00.0      | mc         | 0        |
| daf         | 4000        | va         | 100      |
|             |             | ta         | 0.0      |
|             |             | ra         | 0.0      |
|             |             | mb         | ph       |

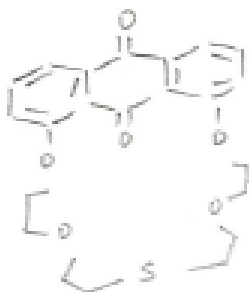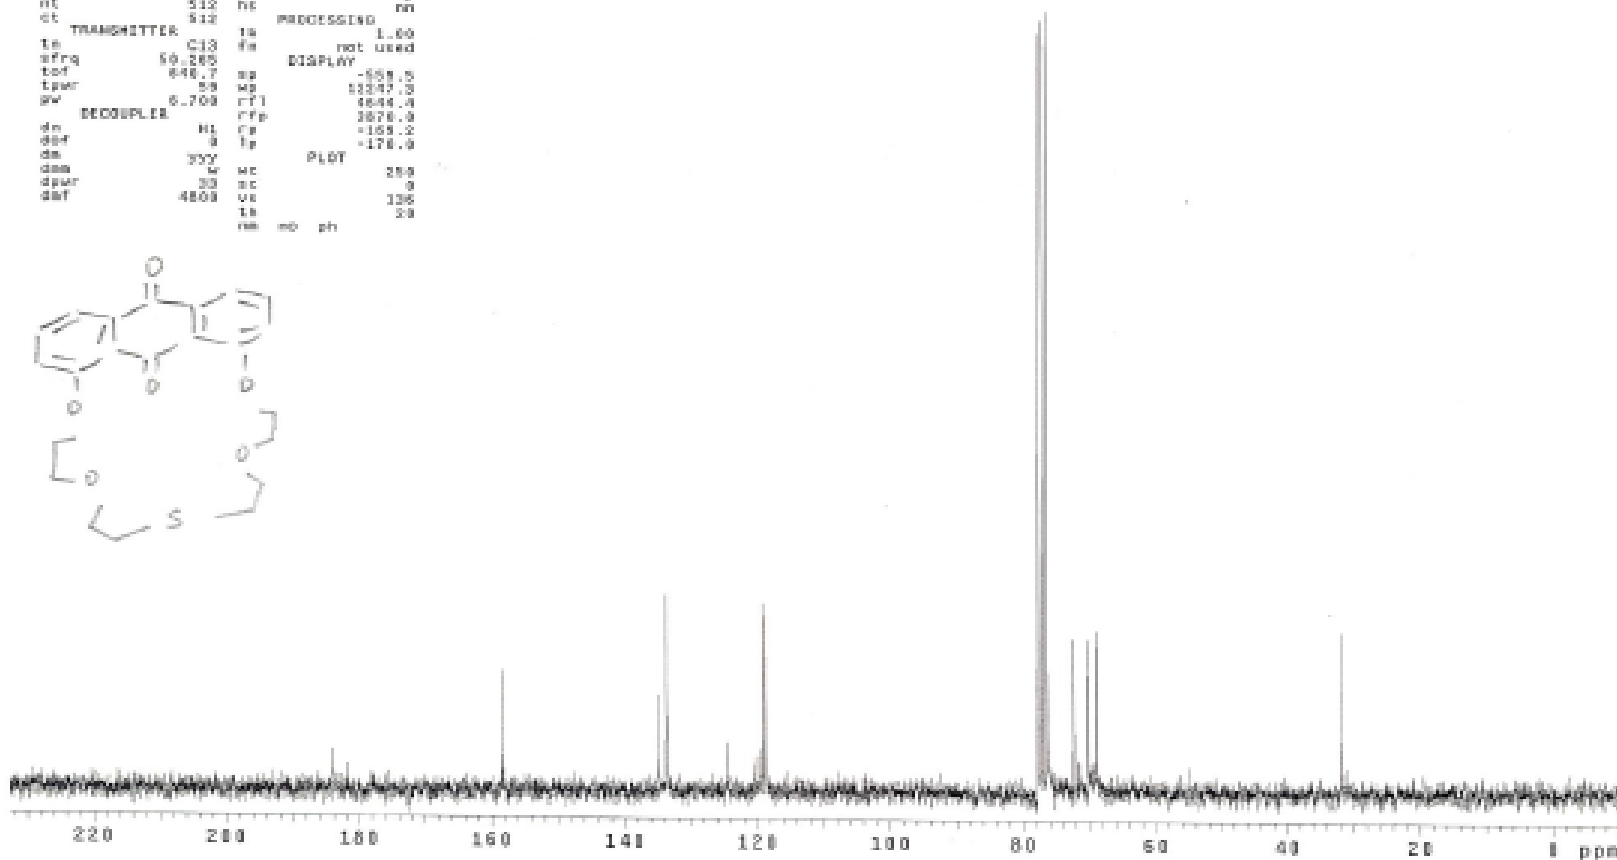

SI Fig. 2: <sup>13</sup>C NMR of compound 2.

STANDARD 1H OBSERVE

expl s2pu1

| SAMPLE               |                | SPECIAL    |          |
|----------------------|----------------|------------|----------|
| date                 | Jun 3 2013     | temp       | not used |
| solvent              | CDCl3          | gain       | not used |
| file                 | /export/home/~ | spin       | not used |
| nmr1/vnmr/sys/data/~ |                | hst        | 0.008    |
| /kadal_CESe_1st_06~  |                | pw90       | 11.000   |
| 313.fid              |                | alfa       | 20.000   |
| ACQUISITION          |                | FLAGS      |          |
| sw                   | 3194.9         | il         | n        |
| at                   | 1.994          | in         | n        |
| np                   | 12742          | dp         | y        |
| fb                   | not used       | hs         | nn       |
| bs                   | 16             | PROCESSING |          |
| dl                   | 5.000          | fn         | not used |
| nt                   | 32             | DISPLAY    |          |
| ct                   | 32             | sp         | -16.2    |
| TRANSMITTER          |                | wp         | 2598.2   |
| tn                   | H1             | rfl        | 1849.8   |
| sfrq                 | 199.879        | rfl        | 1447.1   |
| lof                  | 194.6          | rp         | -96.7    |
| tpwr                 | 59             | lp         | -40.8    |
| pw                   | 5.500          | PLOT       |          |
| DECOUPLER            |                | wc         | 250      |
| dn                   | C13            | sc         | 0        |
| dof                  | 0              | vs         | 248      |
| dm                   | nm             | ch         | 54       |
| dmm                  | c              | al         | cdc ph   |
| dpwr                 | 40             |            |          |
| dmf                  | 8500           |            |          |

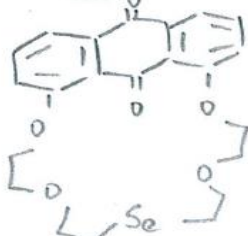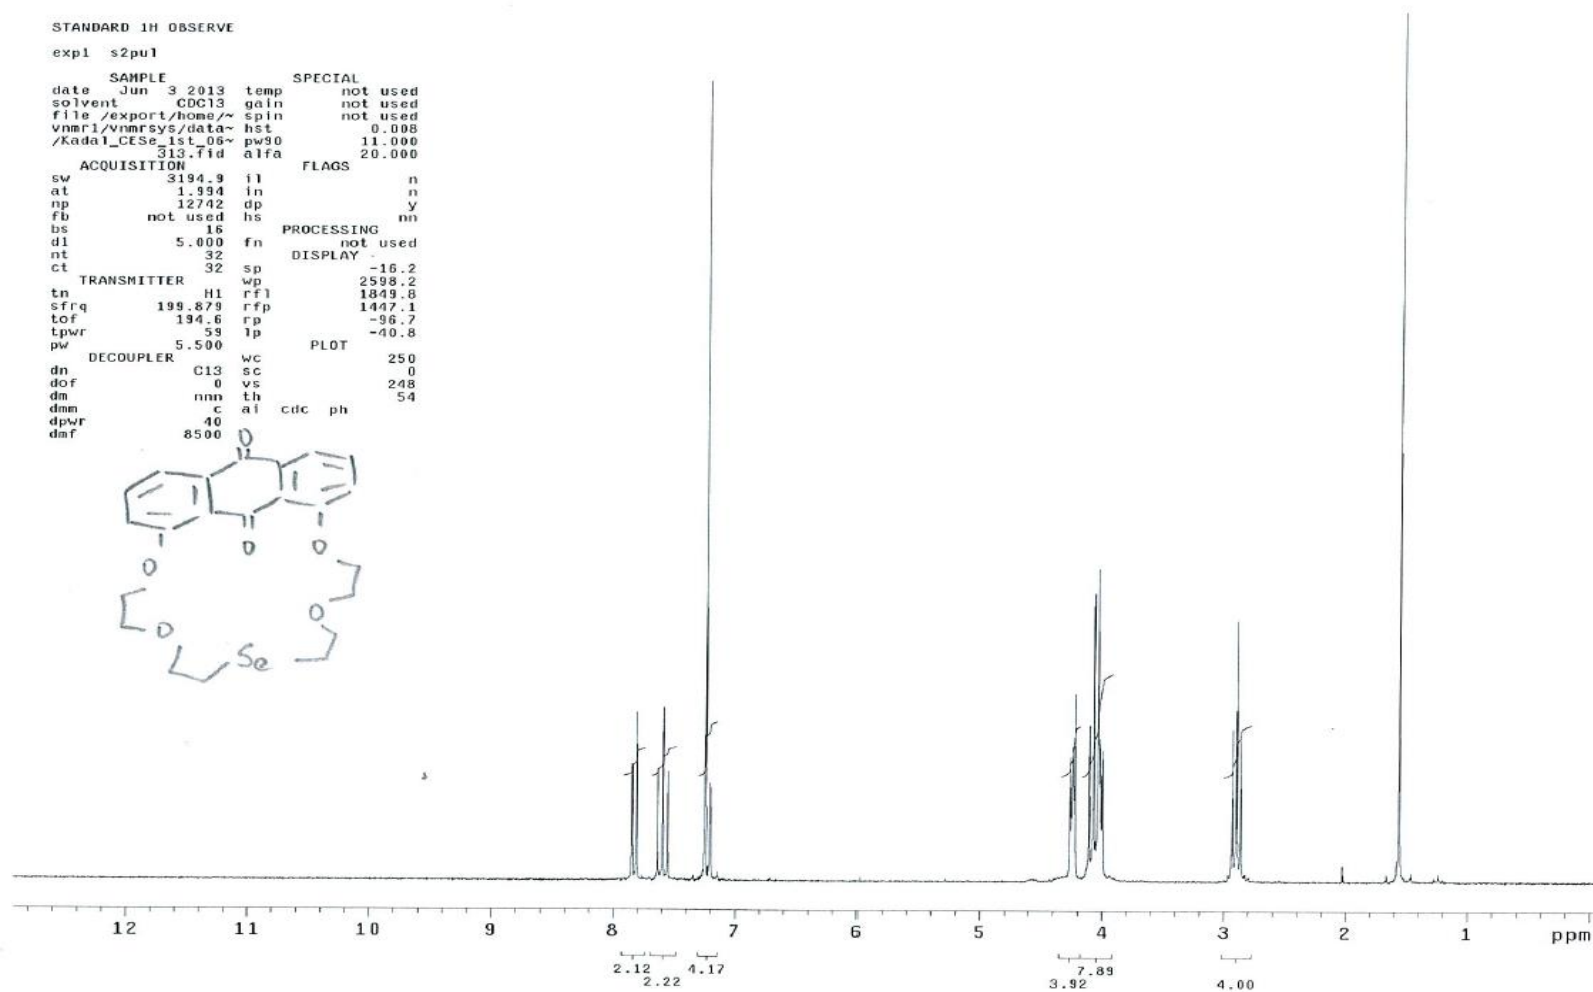

SI Fig. 3: <sup>1</sup>H NMR of compound **3**.

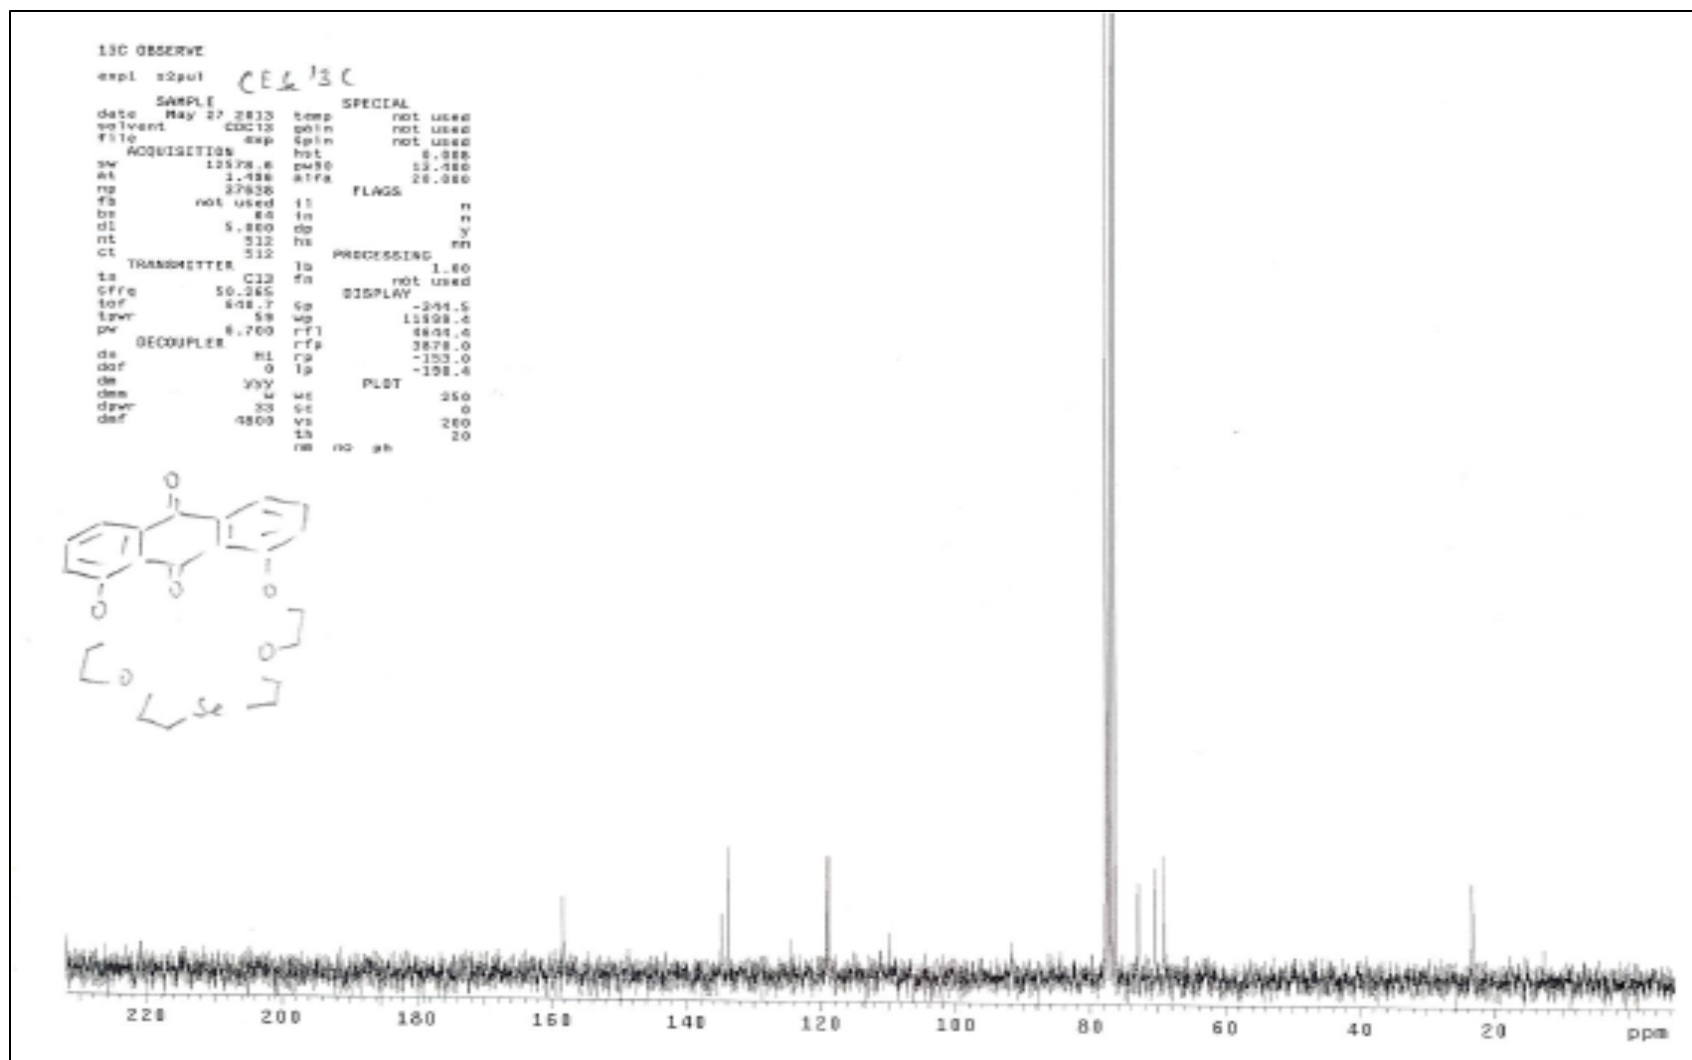

SI Fig. 4:  $^{13}\text{C}$  NMR of compound 3.

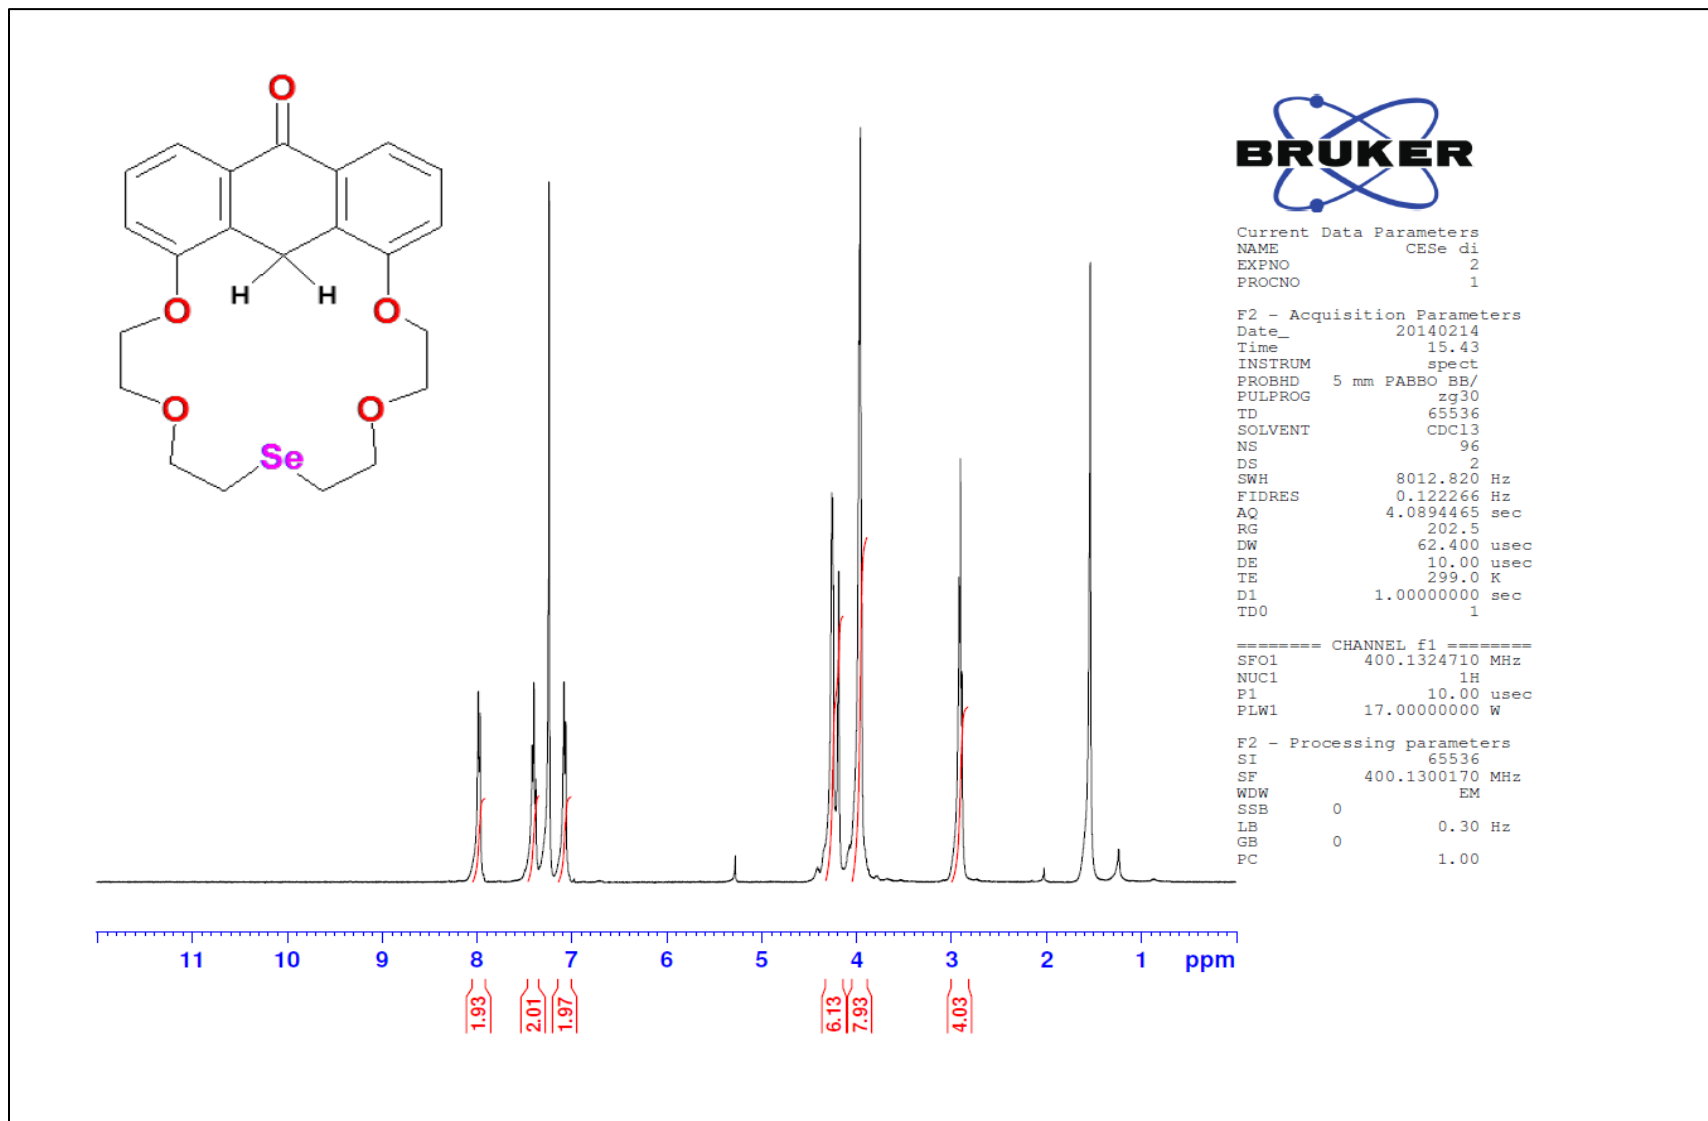

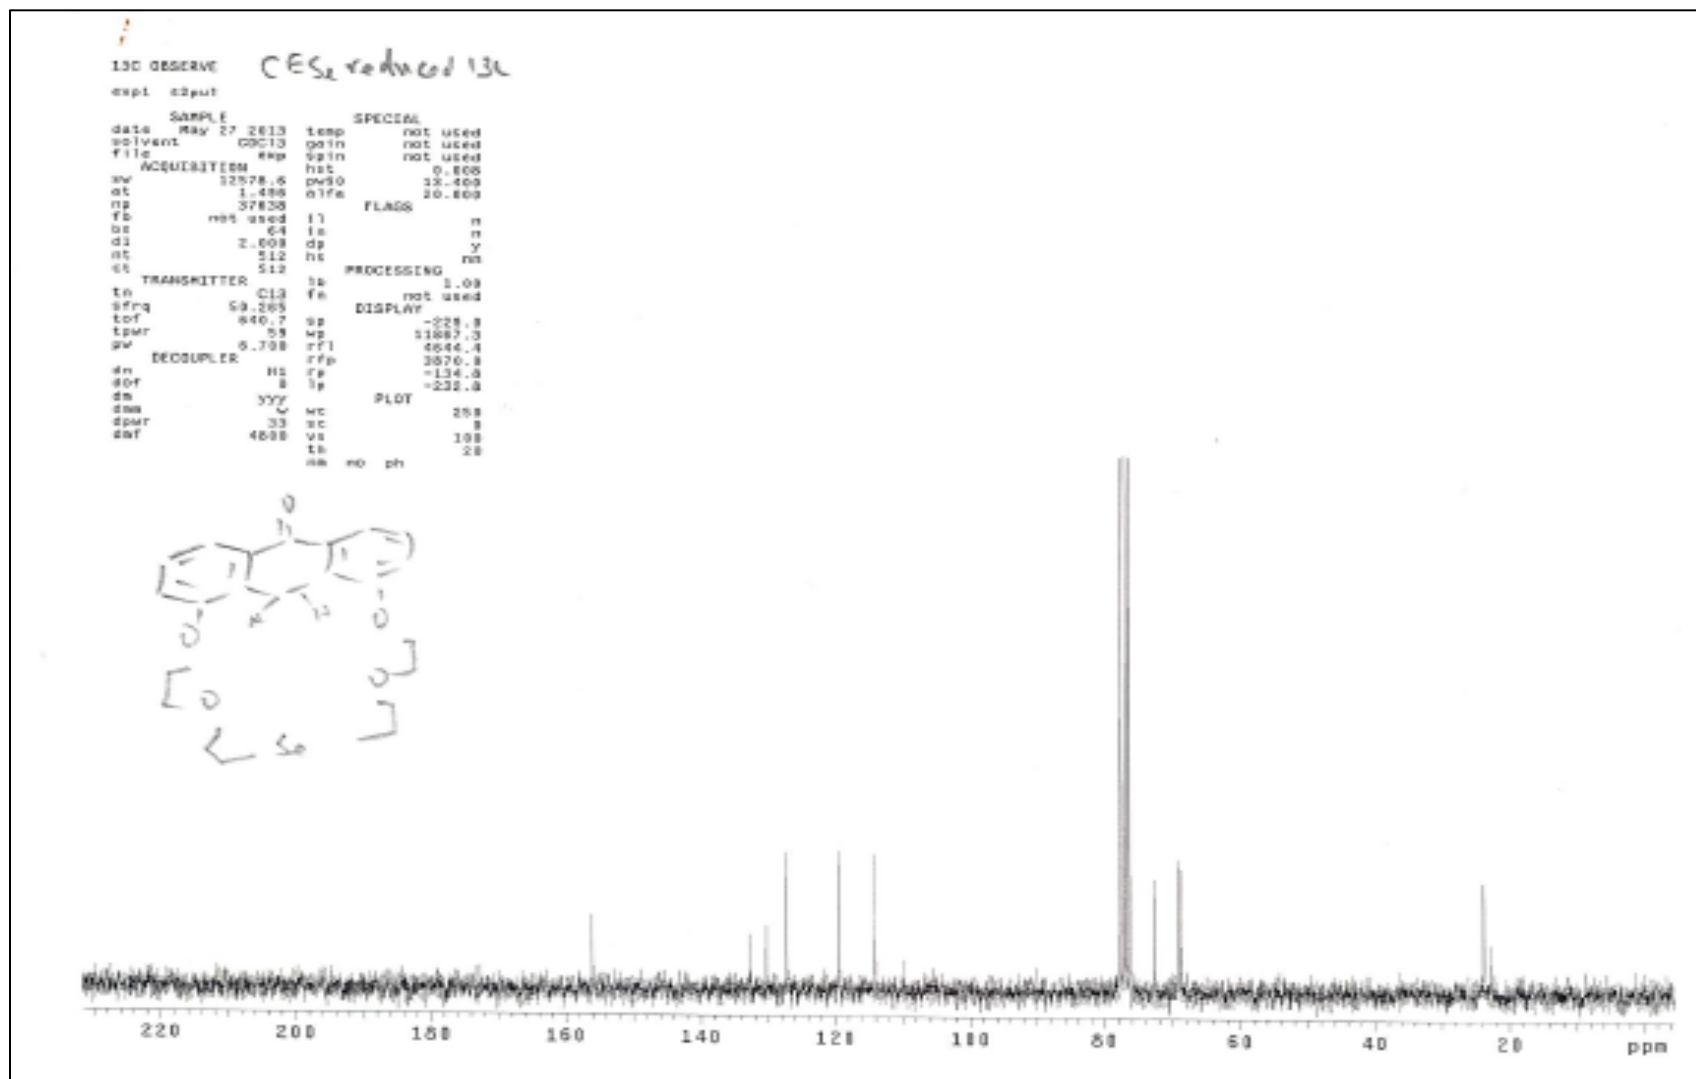

SI Fig. 6: <sup>13</sup>C NMR of compound 4.

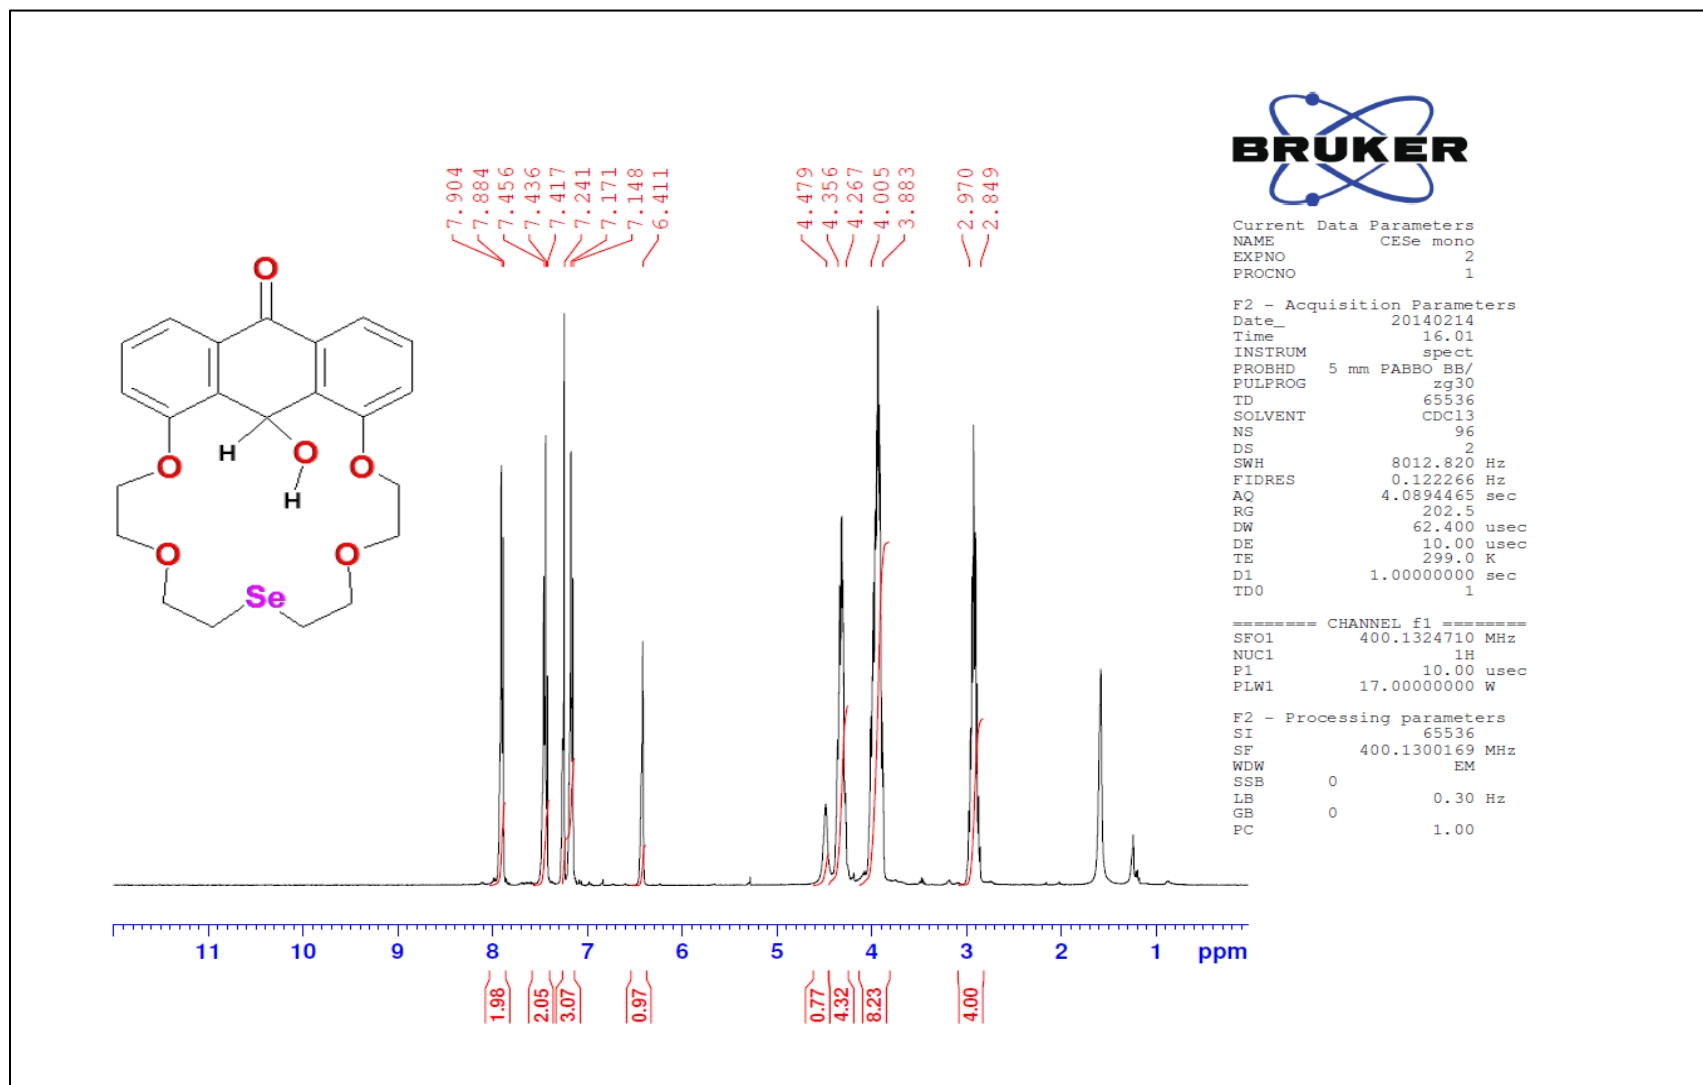

SI Fig. 7: <sup>1</sup>H NMR of compound **5**.



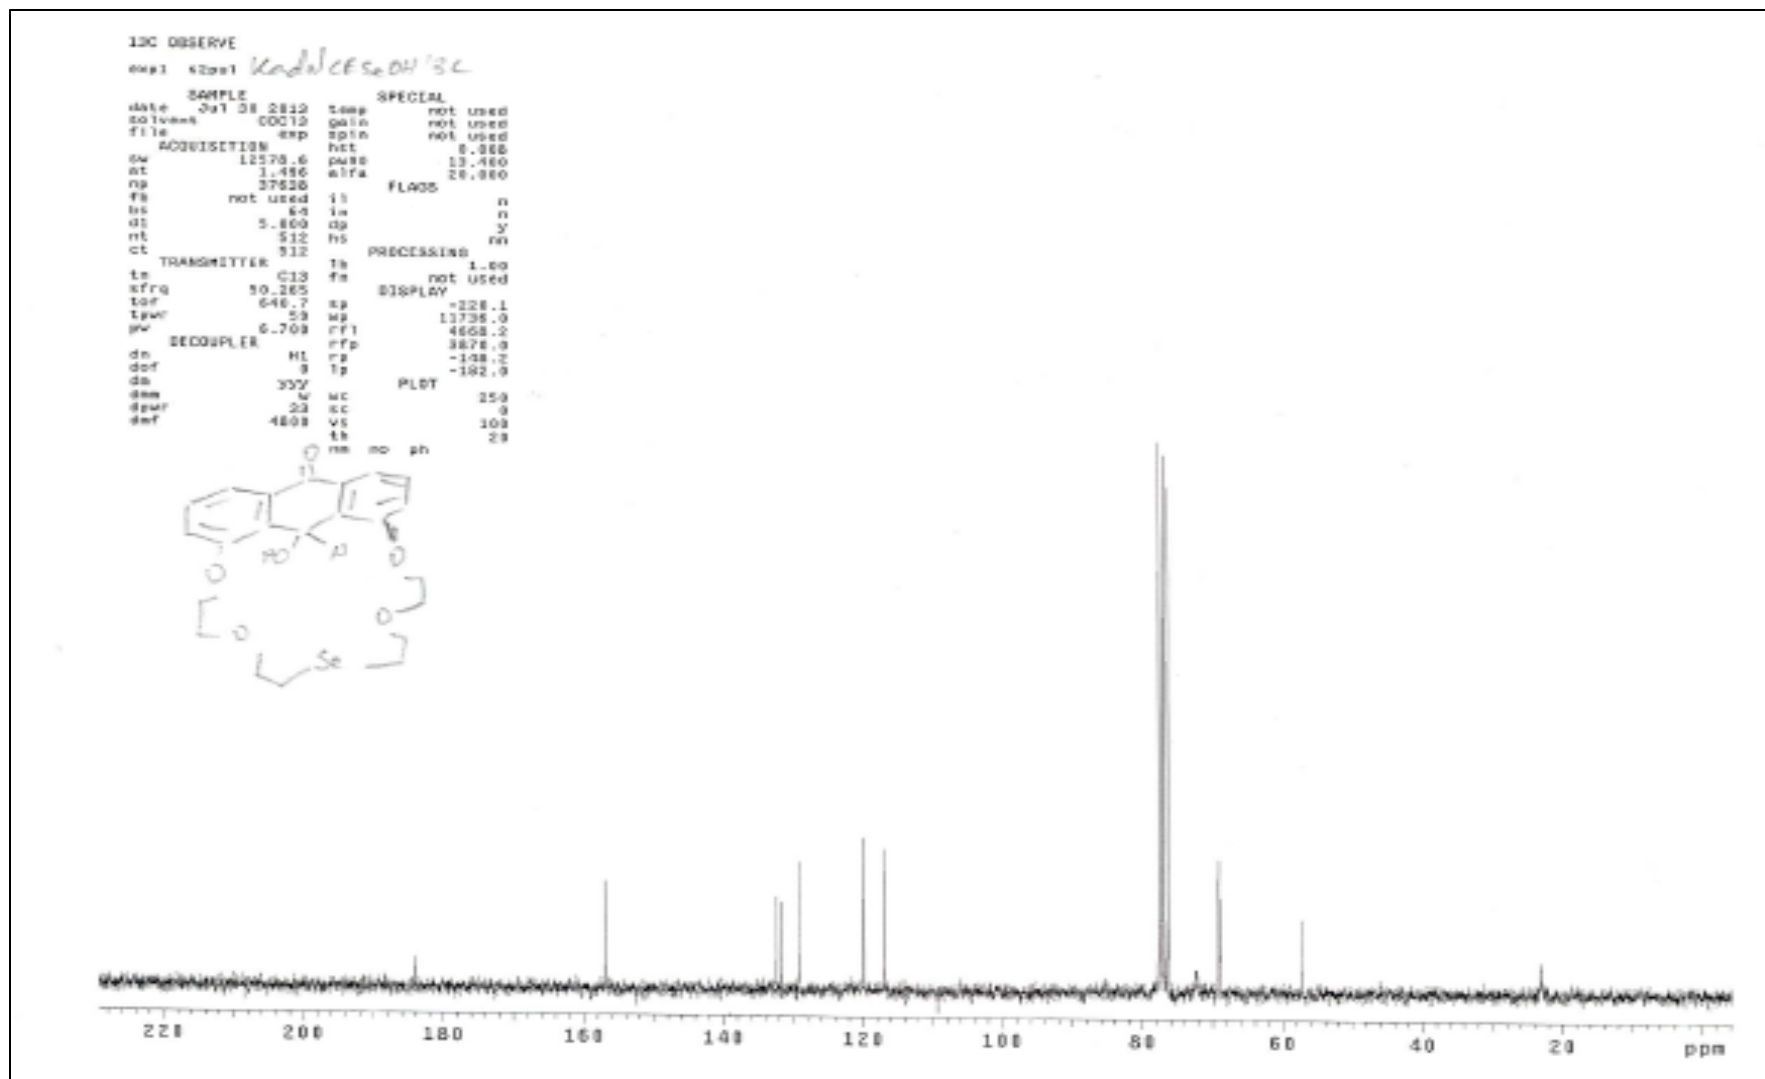

SI Fig. 8: <sup>13</sup>C NMR of compound 5.

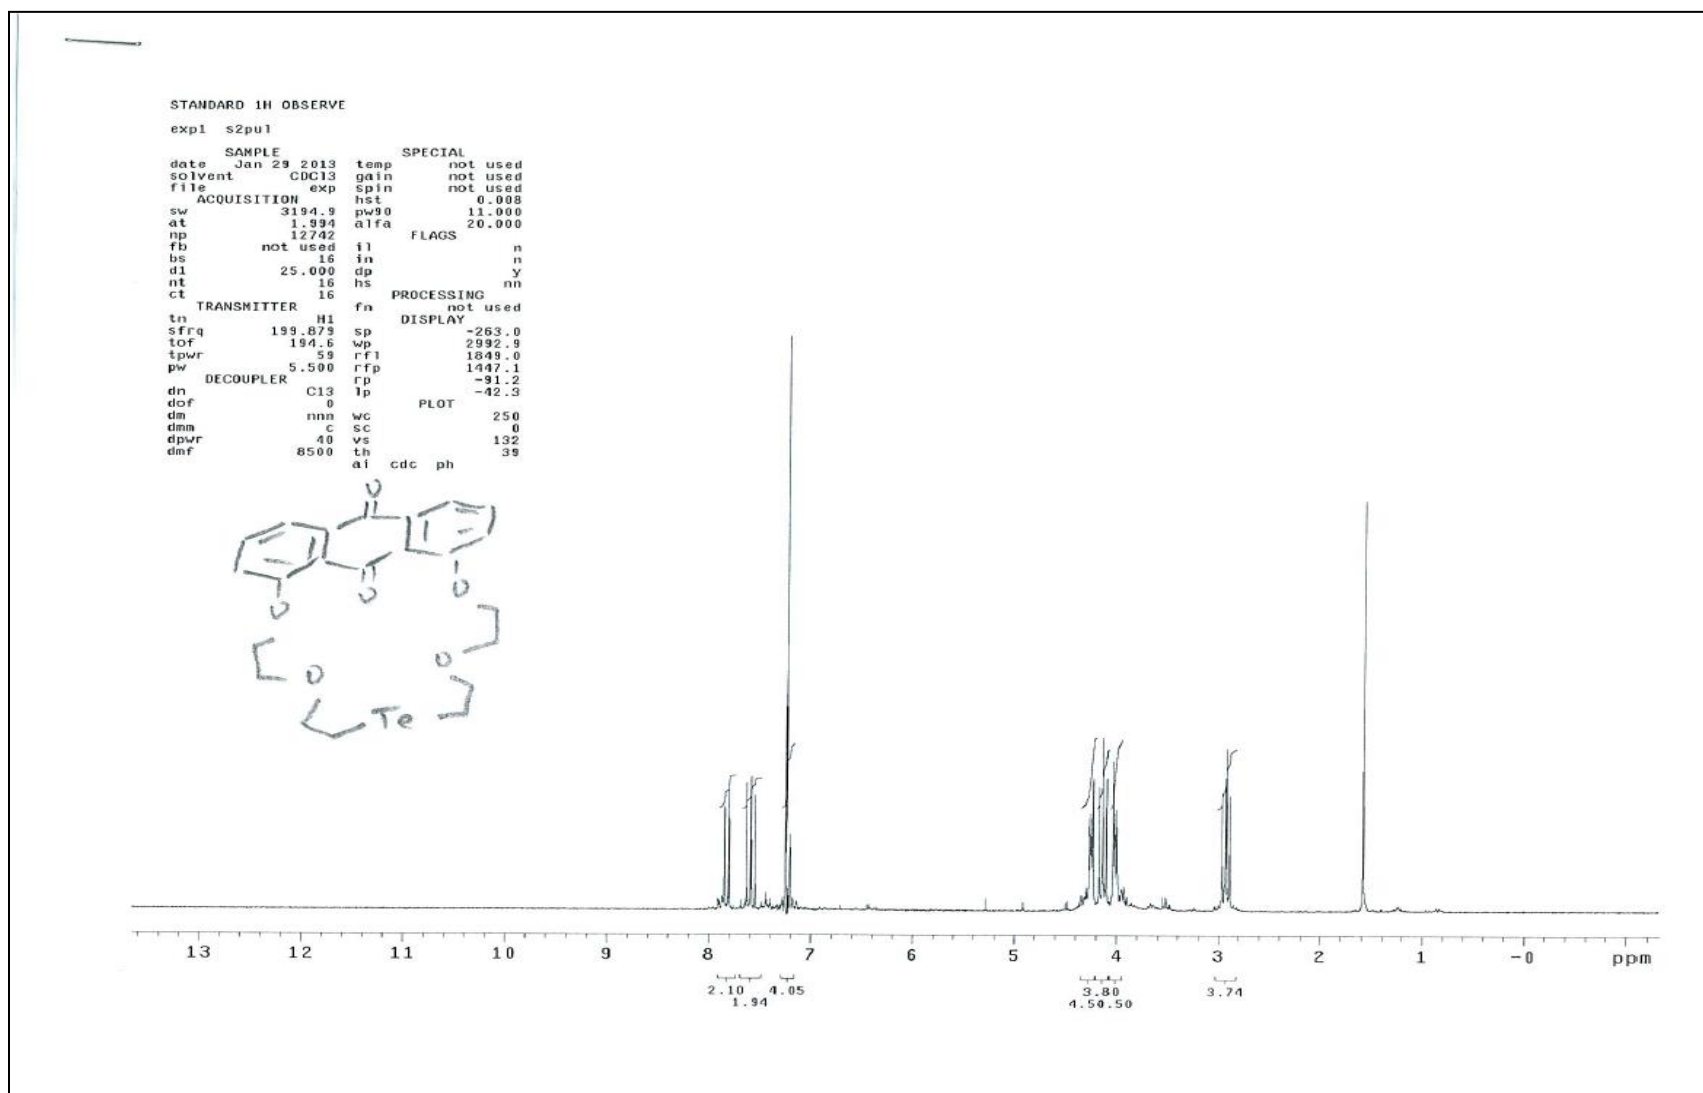

SI Fig. 9:  $^1\text{H}$  NMR of compound 6.

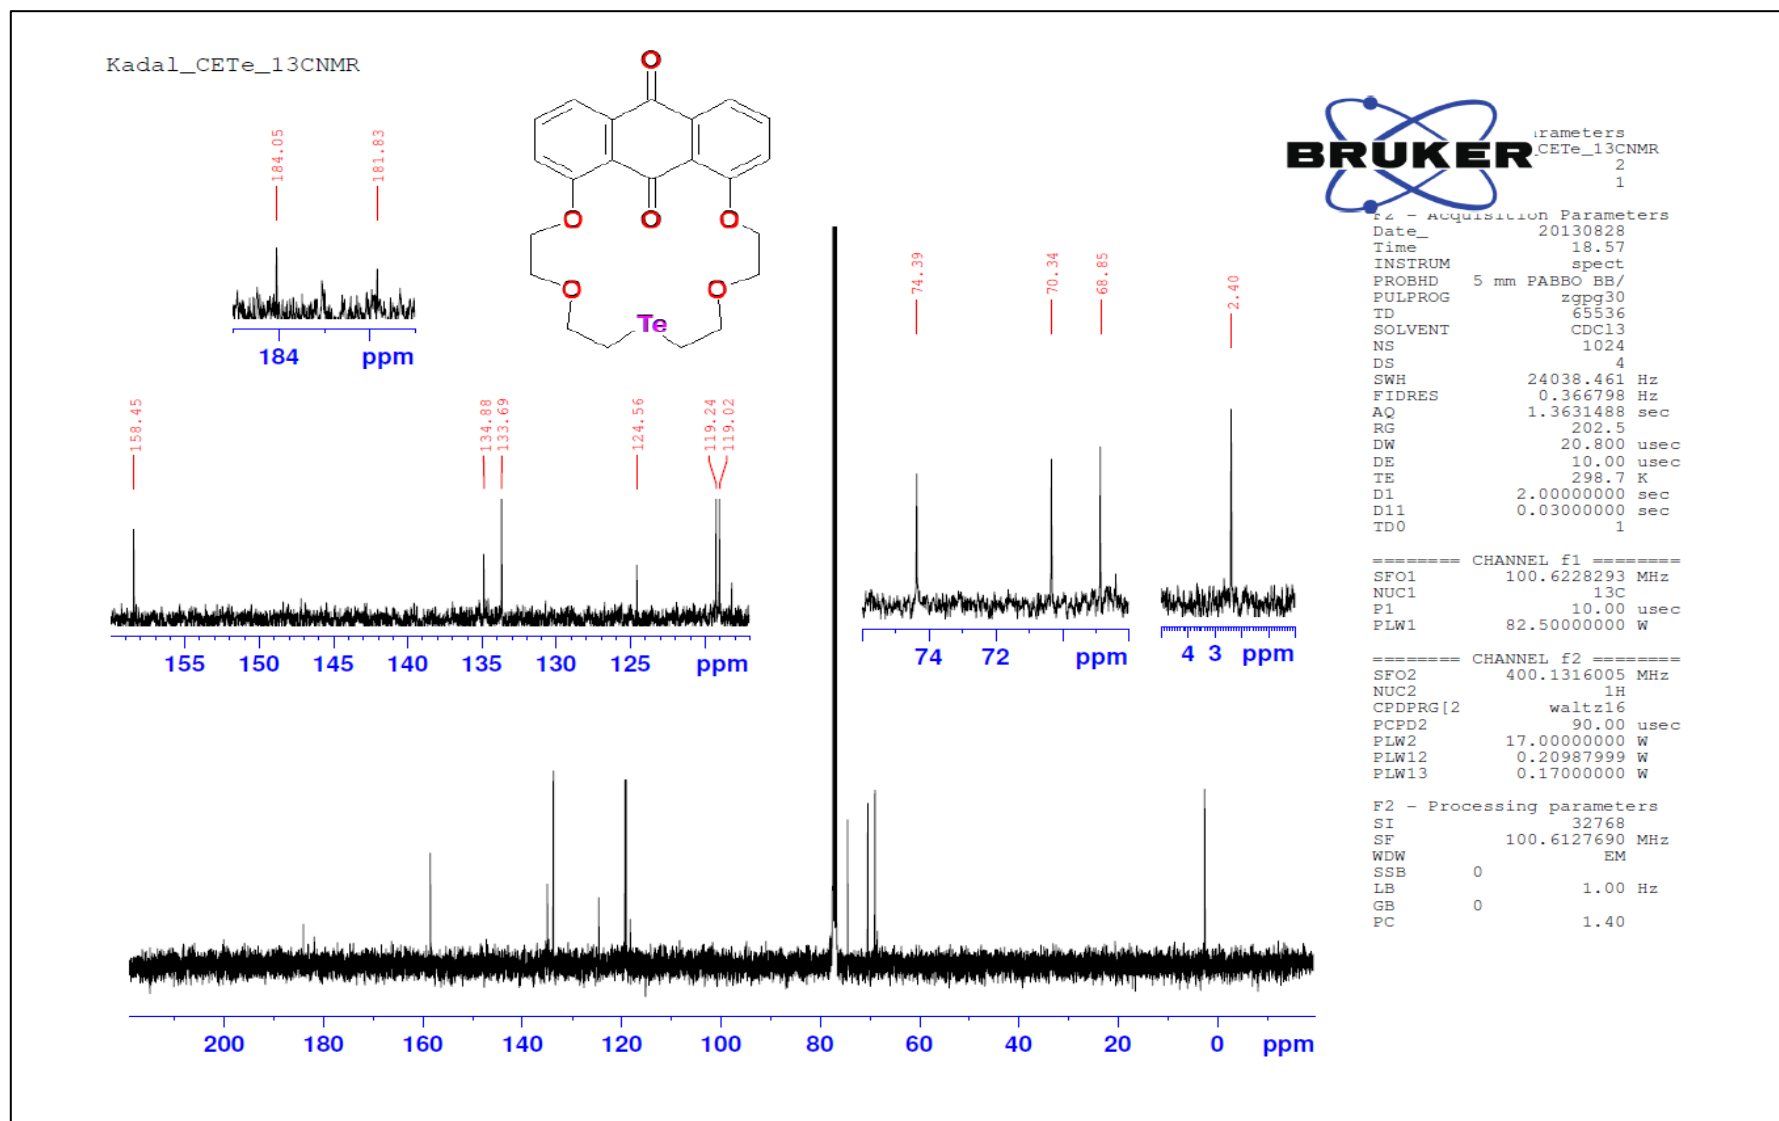

SI Fig. 10:  $^{13}\text{C}$  NMR of compound **6**.

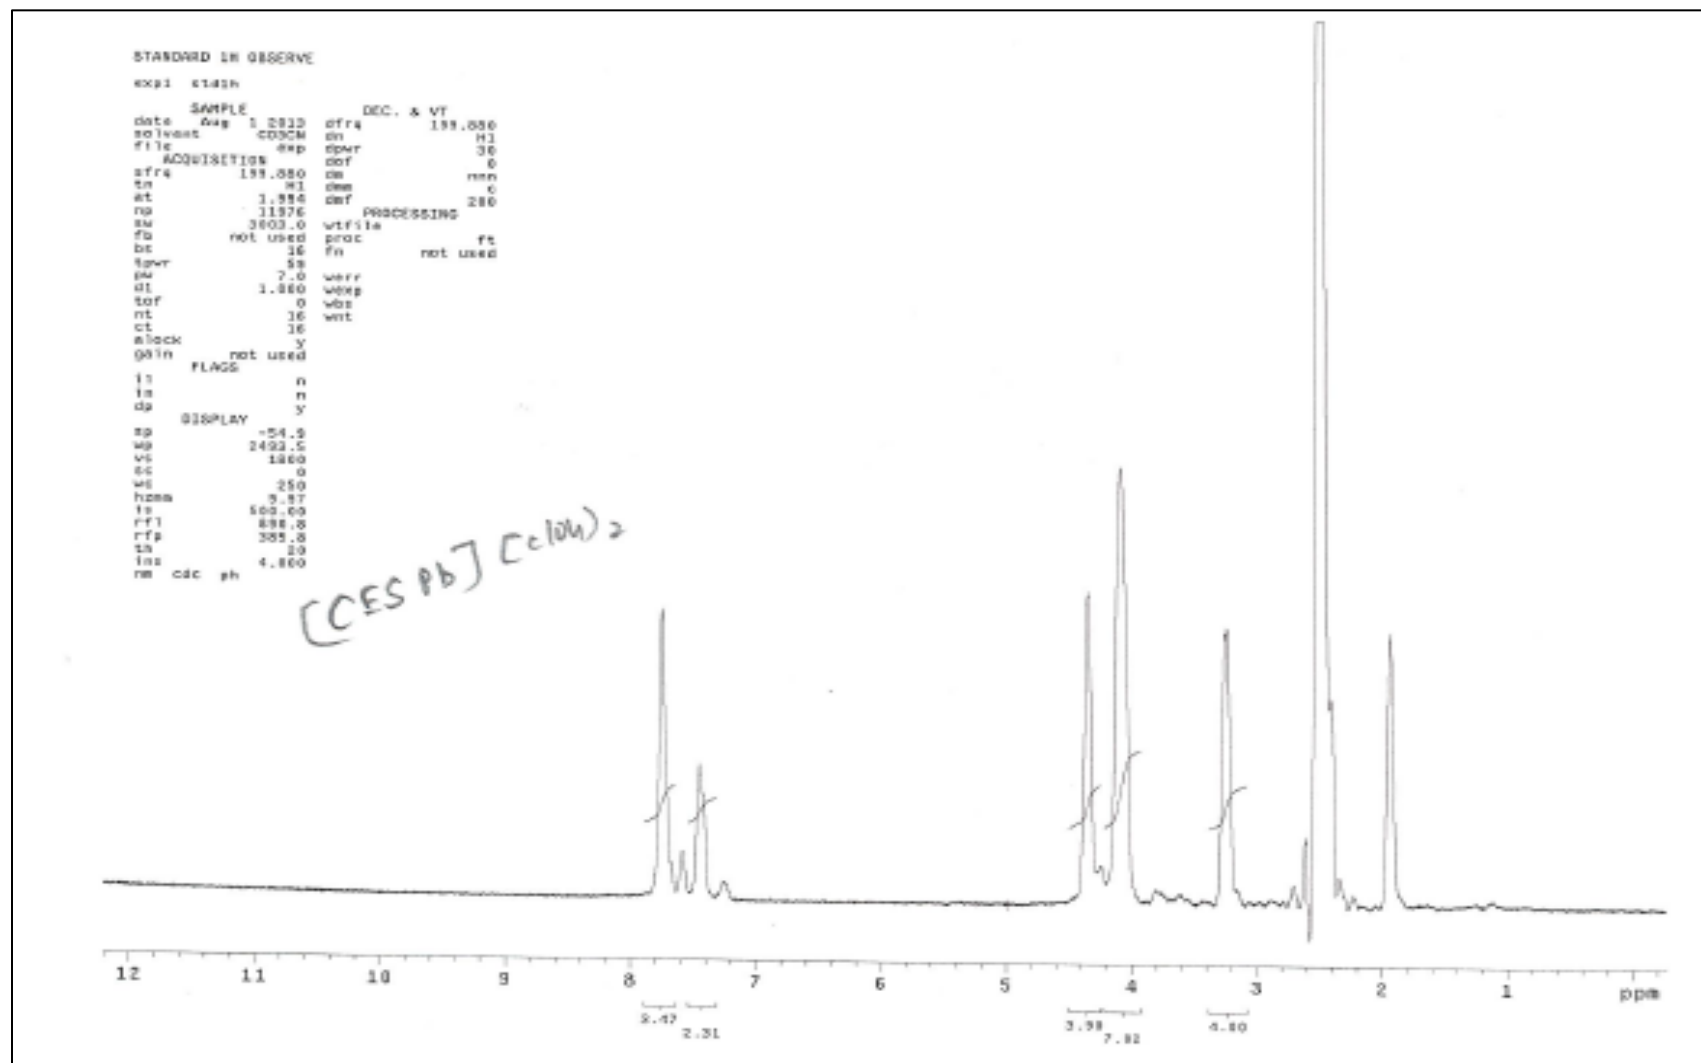

SI Fig. 11:  $^1\text{H}$  NMR of compound **7**.

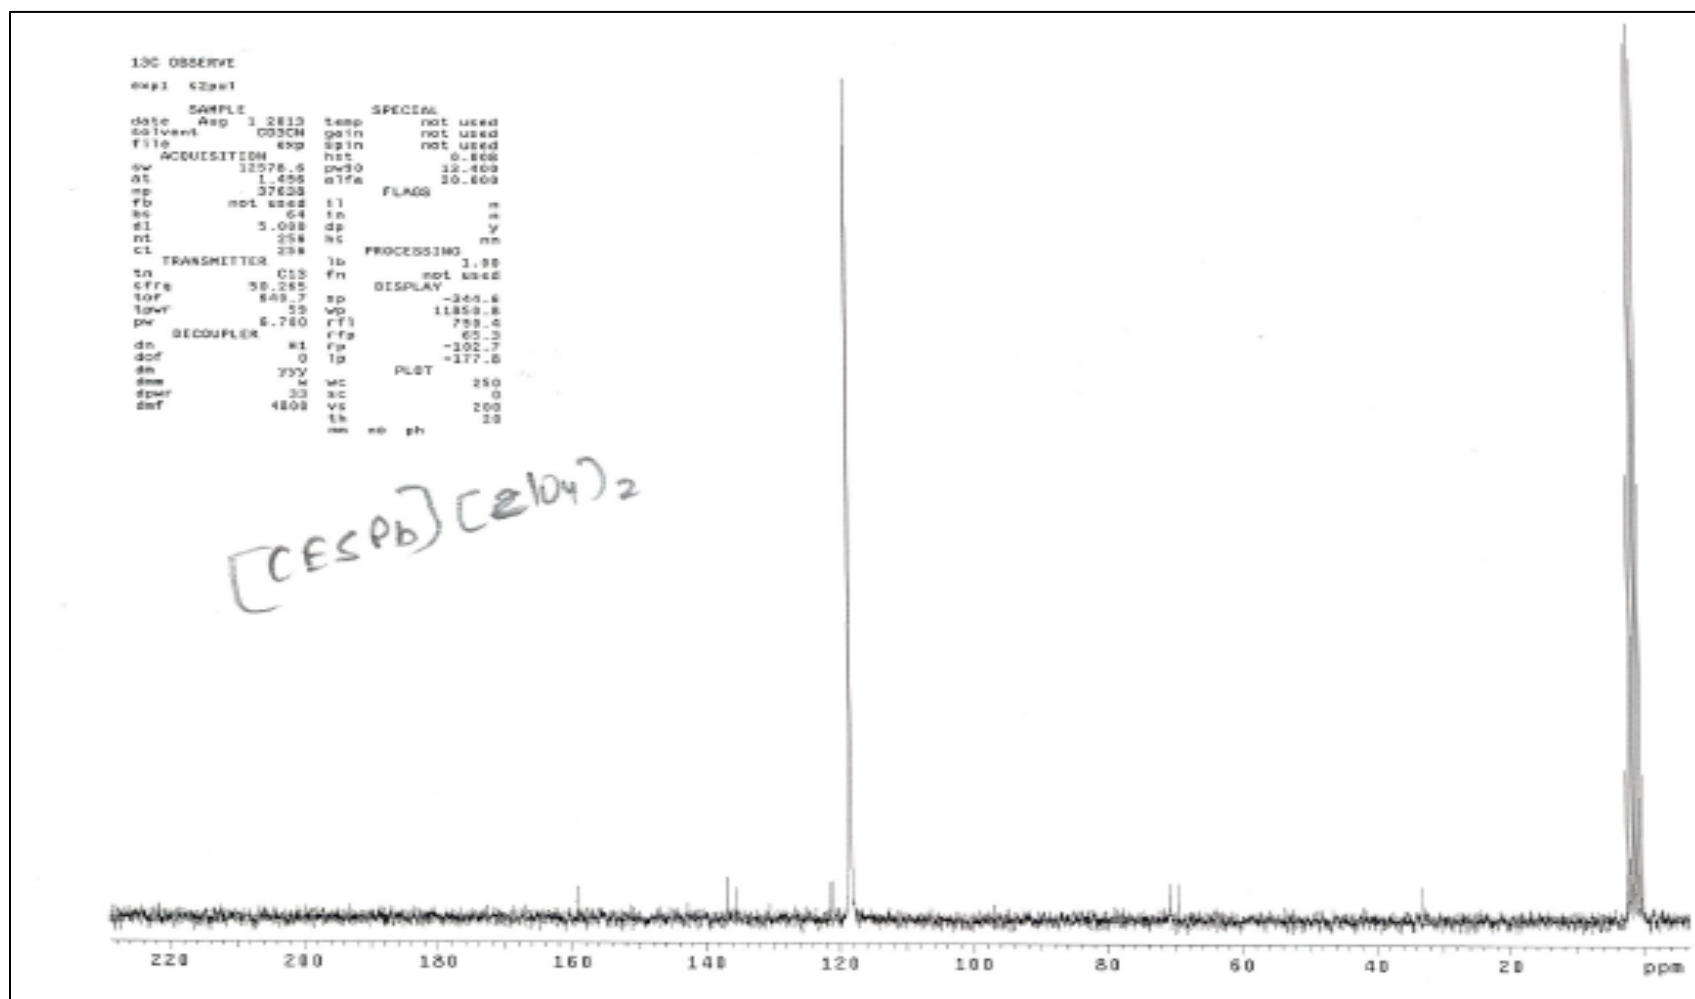

SI Fig. 12:  $^{13}\text{C}$  NMR of compound 7.



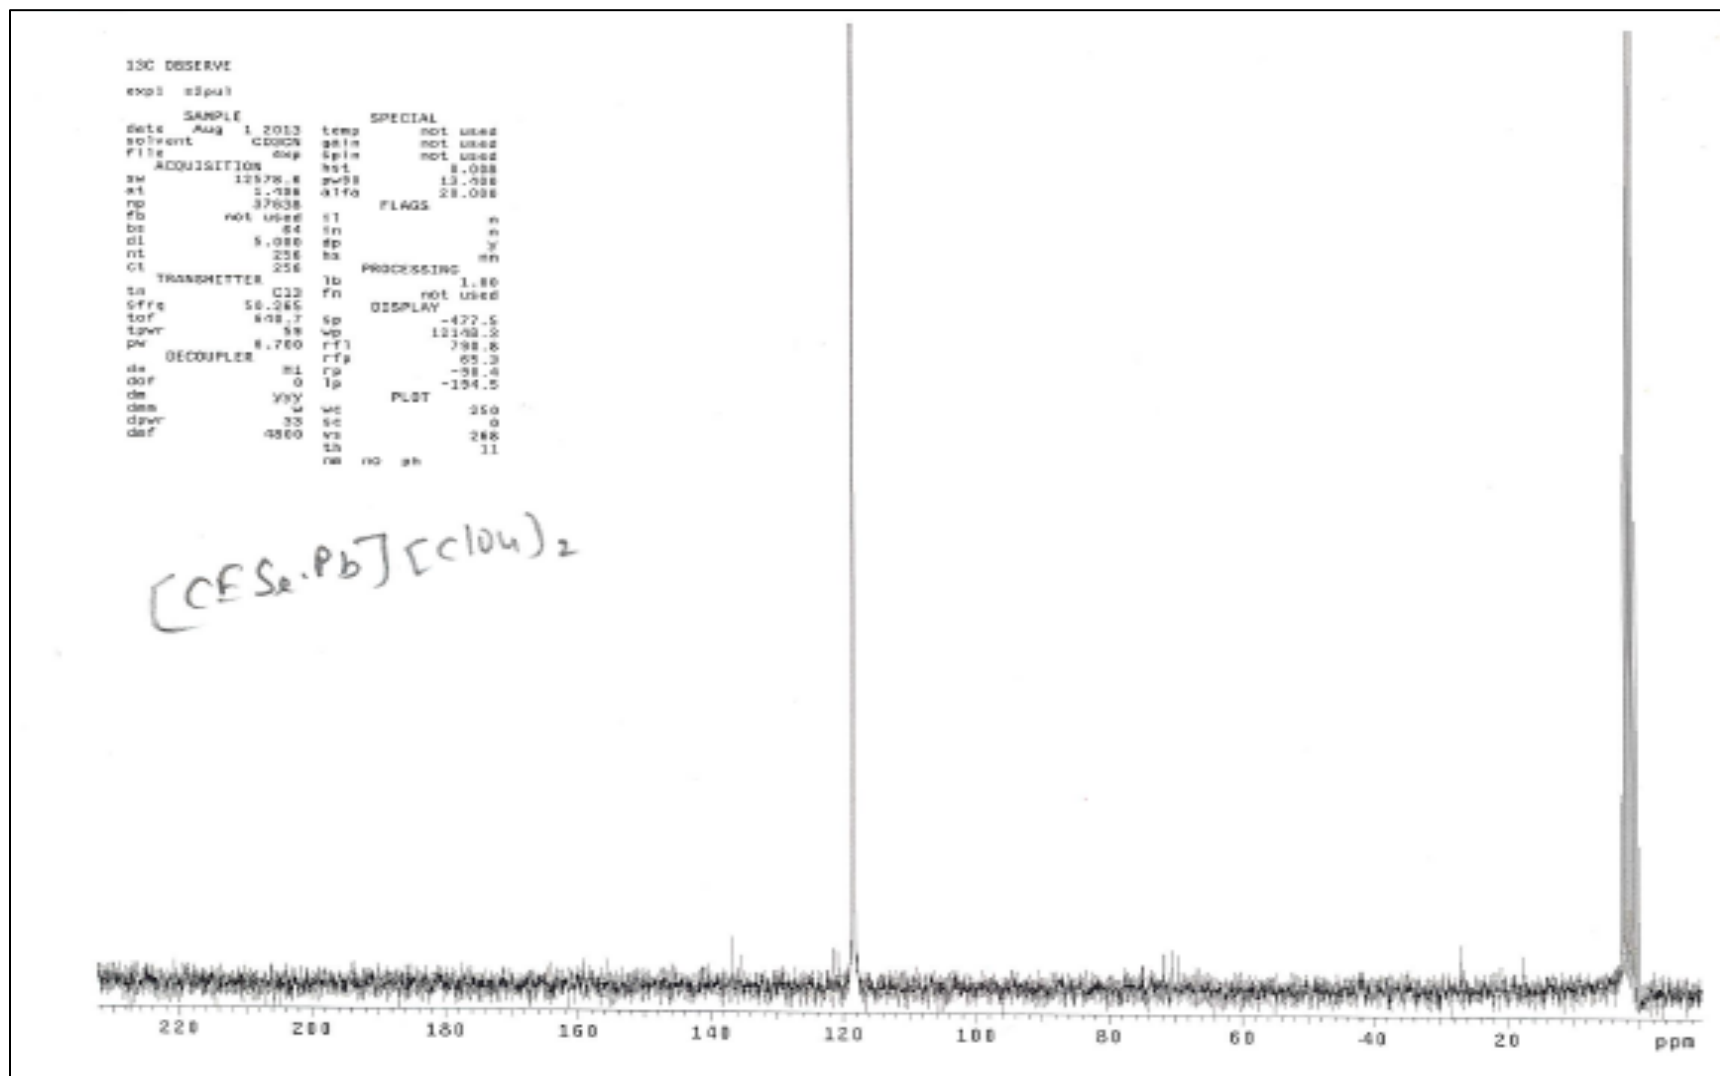

SI Fig. 14:  $^{13}\text{C}$  NMR of compound 8.

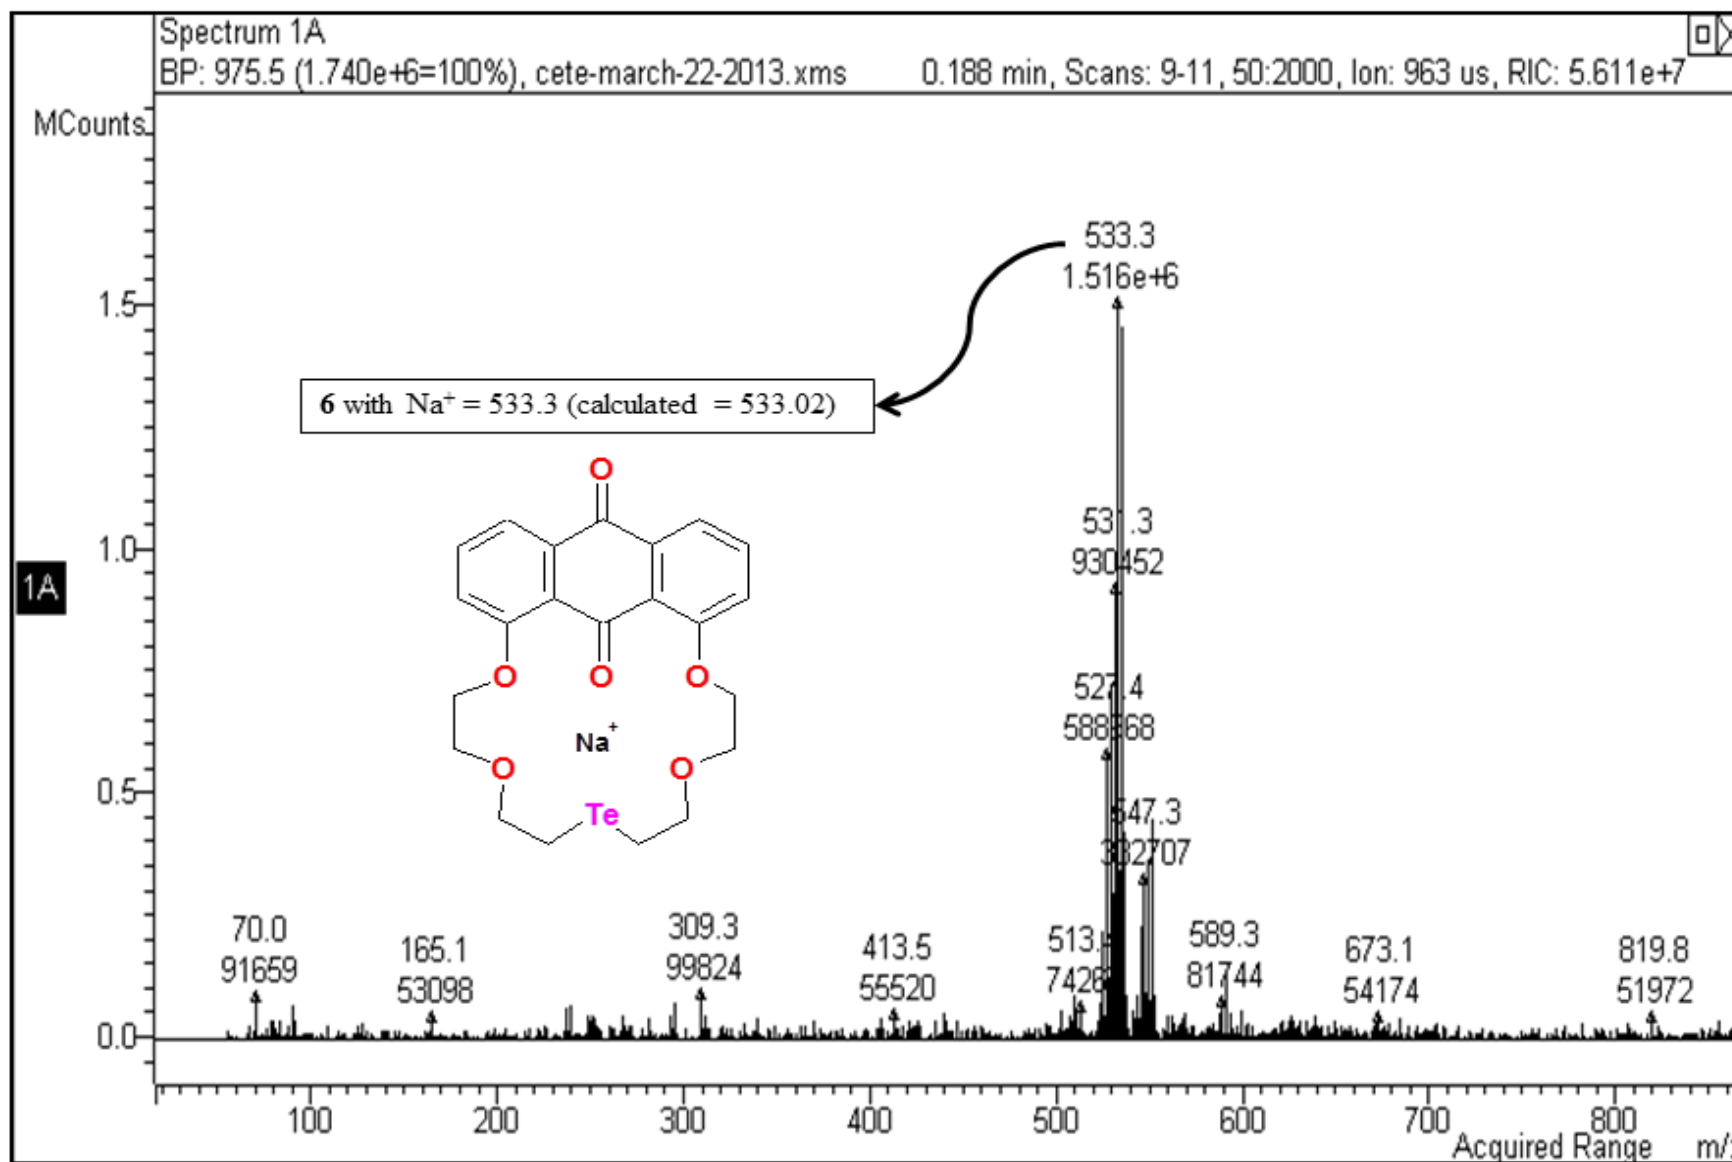

SI Fig. 15: ESI Mass spectrum of compound **6**.



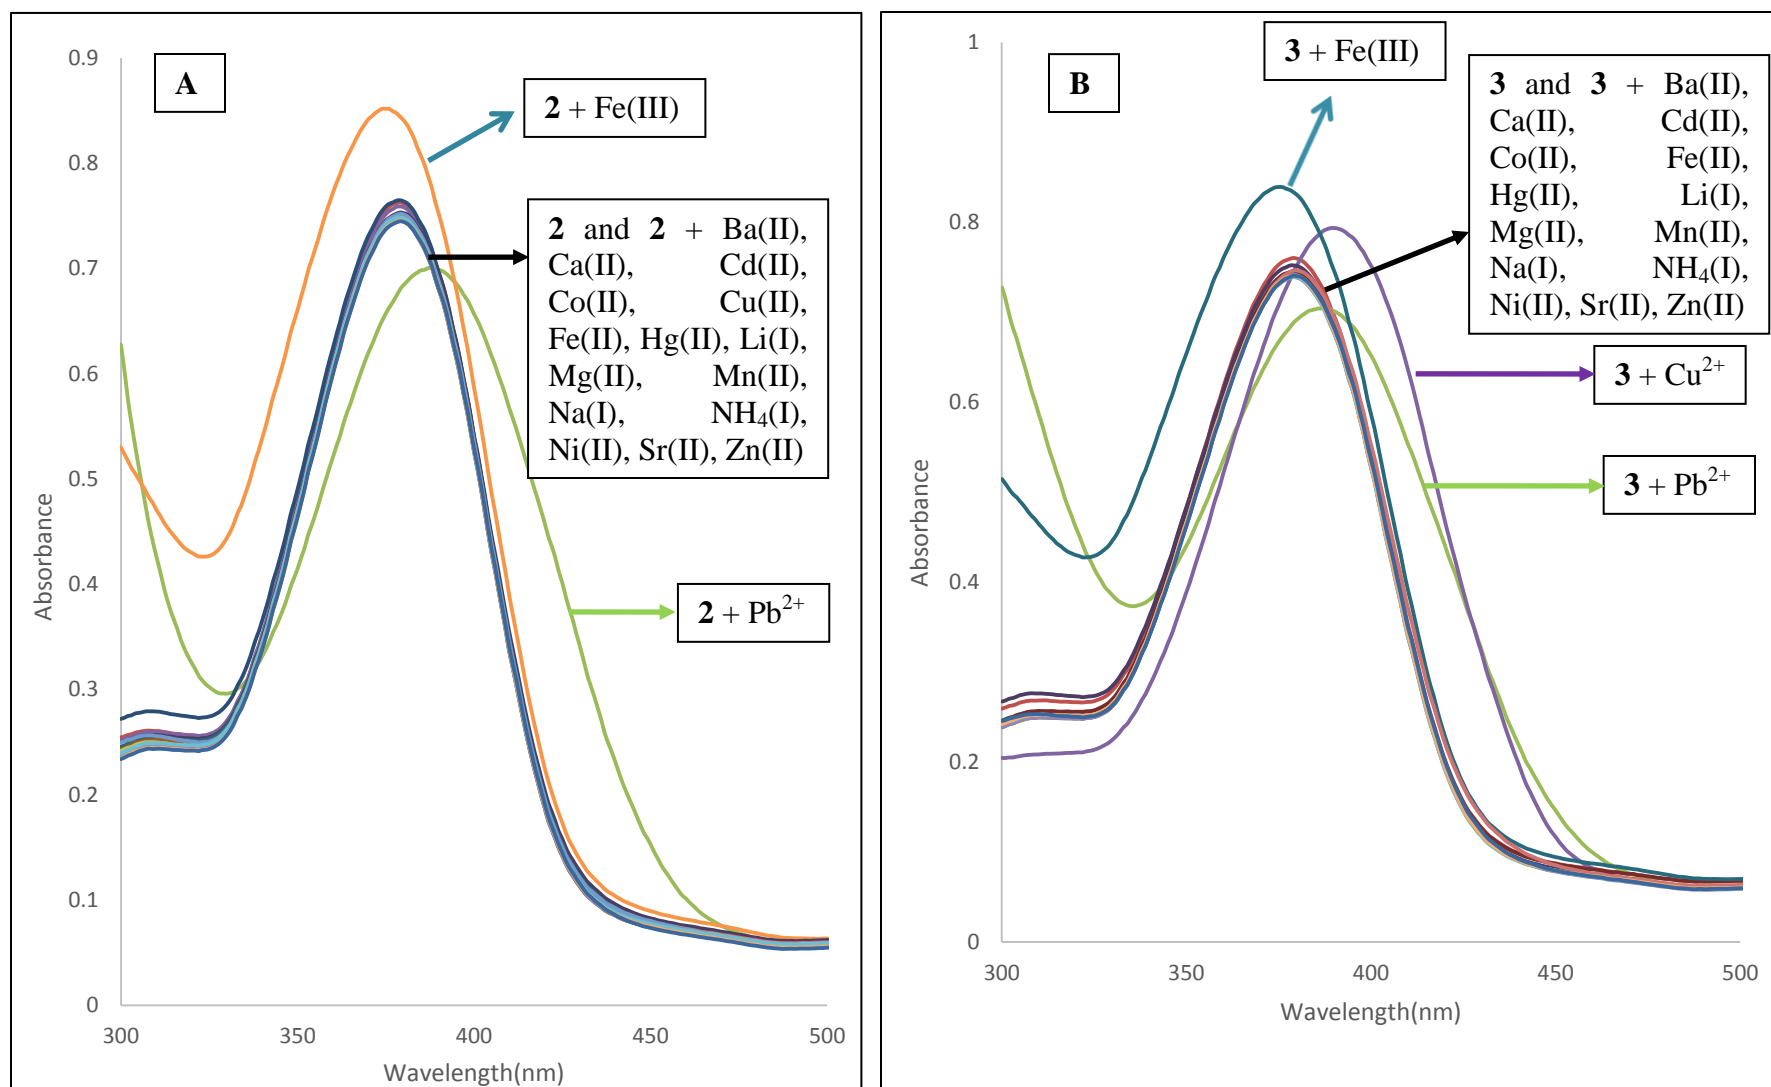

SI Fig. 16: UV-visible of compound **2** (A) and **3** (B) using  $1 \times 10^{-4}$  molar in CH<sub>3</sub>CN mixed with 2 equivalents of metal ions.

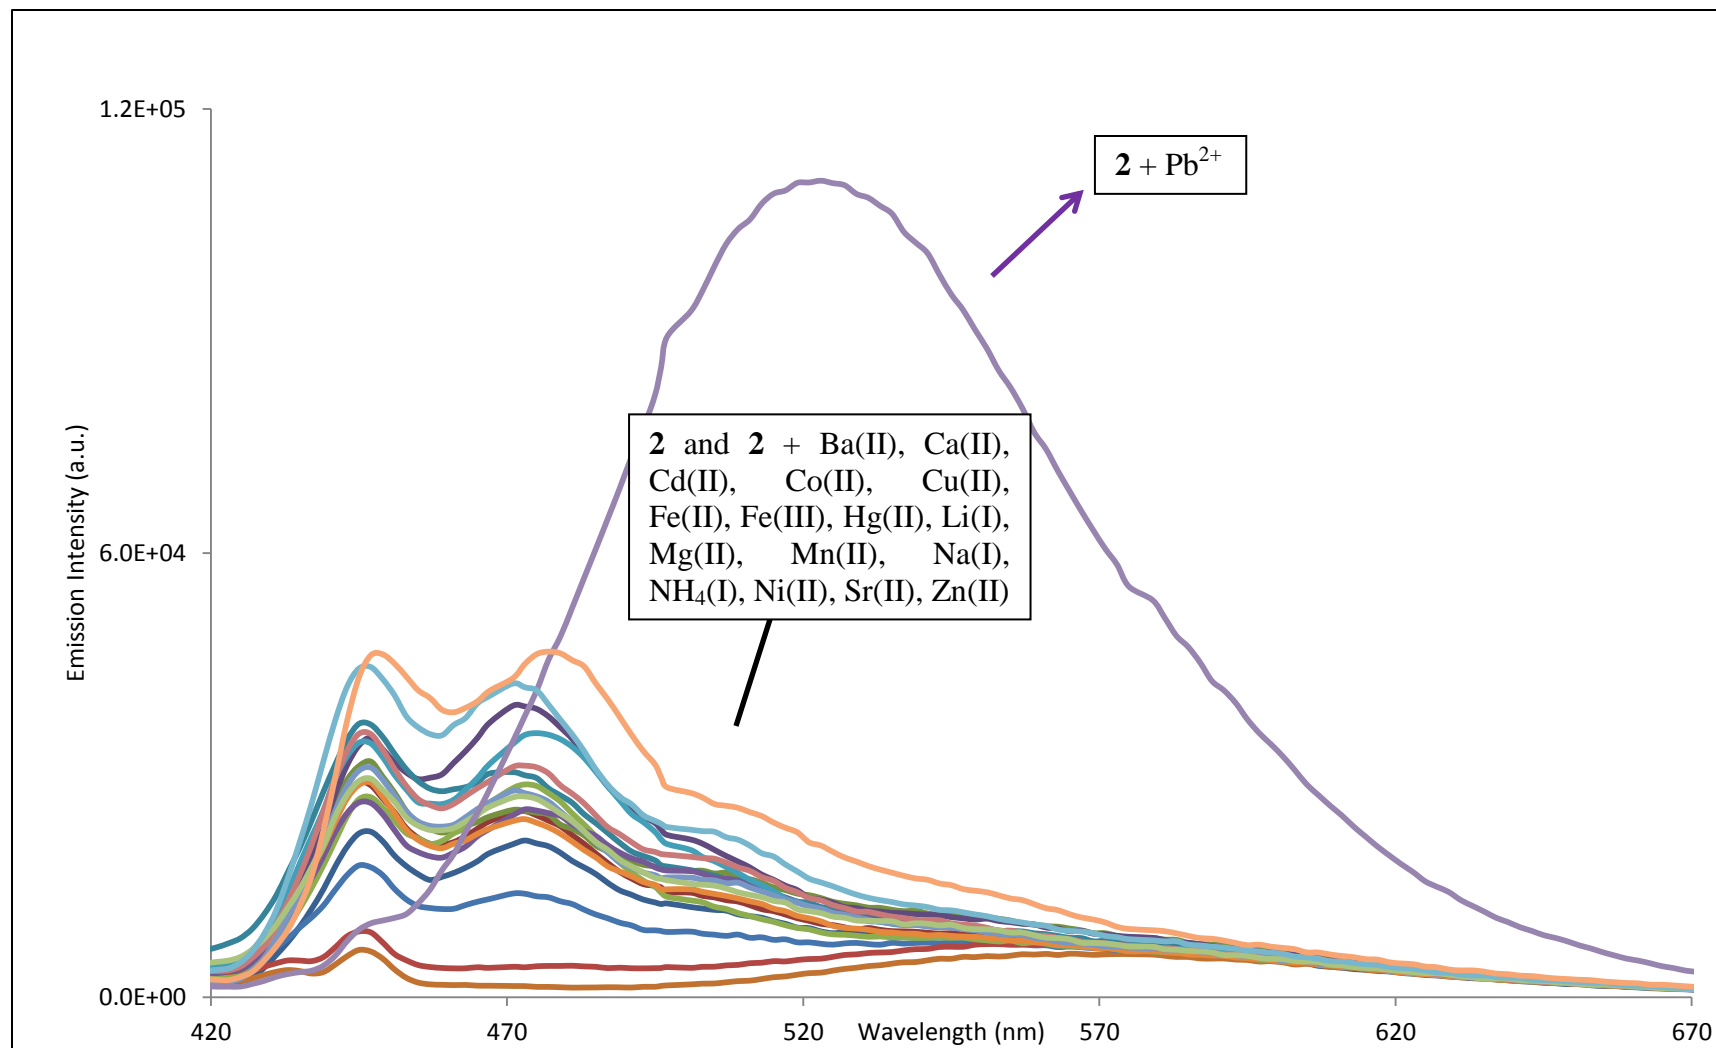

SI Fig. 17: Emission of **2** with different metal ions.  $1 \times 10^{-4}$  M of **2** in acetonitrile with two equivalents of  $M^{n+}$ . Excitation wavelength is 390 nm.

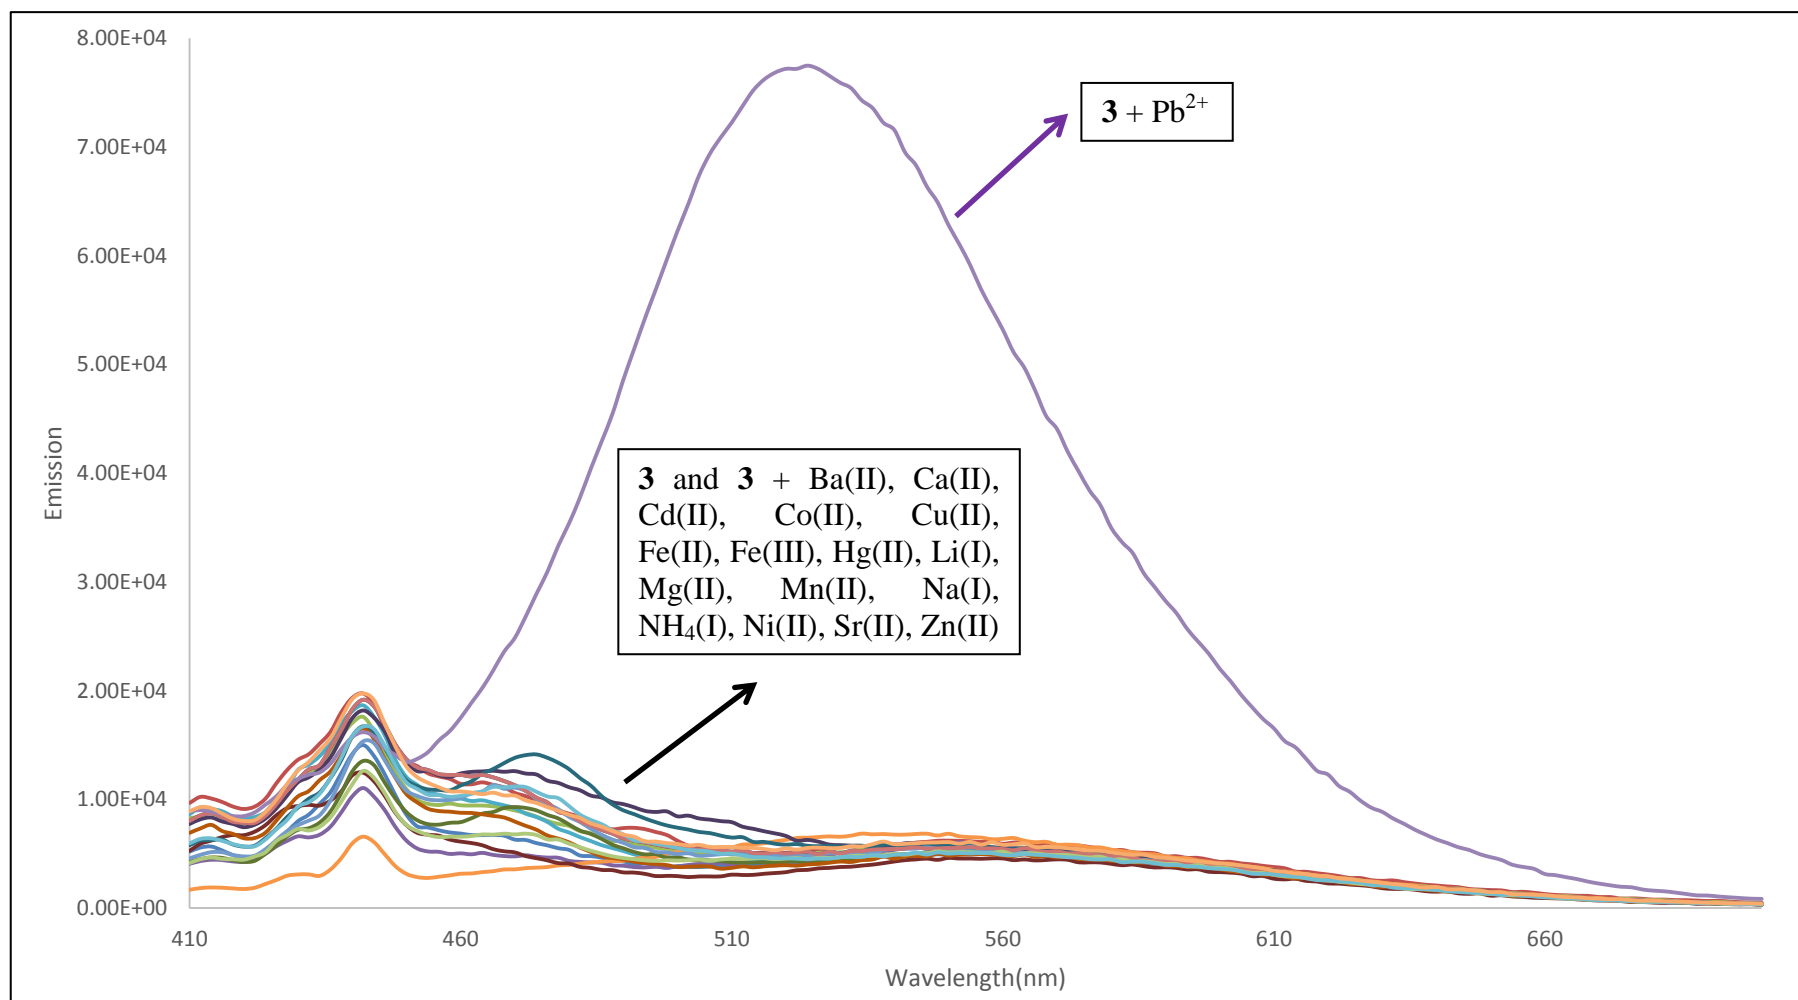

SI Fig. 18: Emission of **3** with different metal ions.  $1 \times 10^{-4}$  M of **3** in acetonitrile with two equivalents of  $M^{n+}$ . Excitation wavelength is 390 nm.

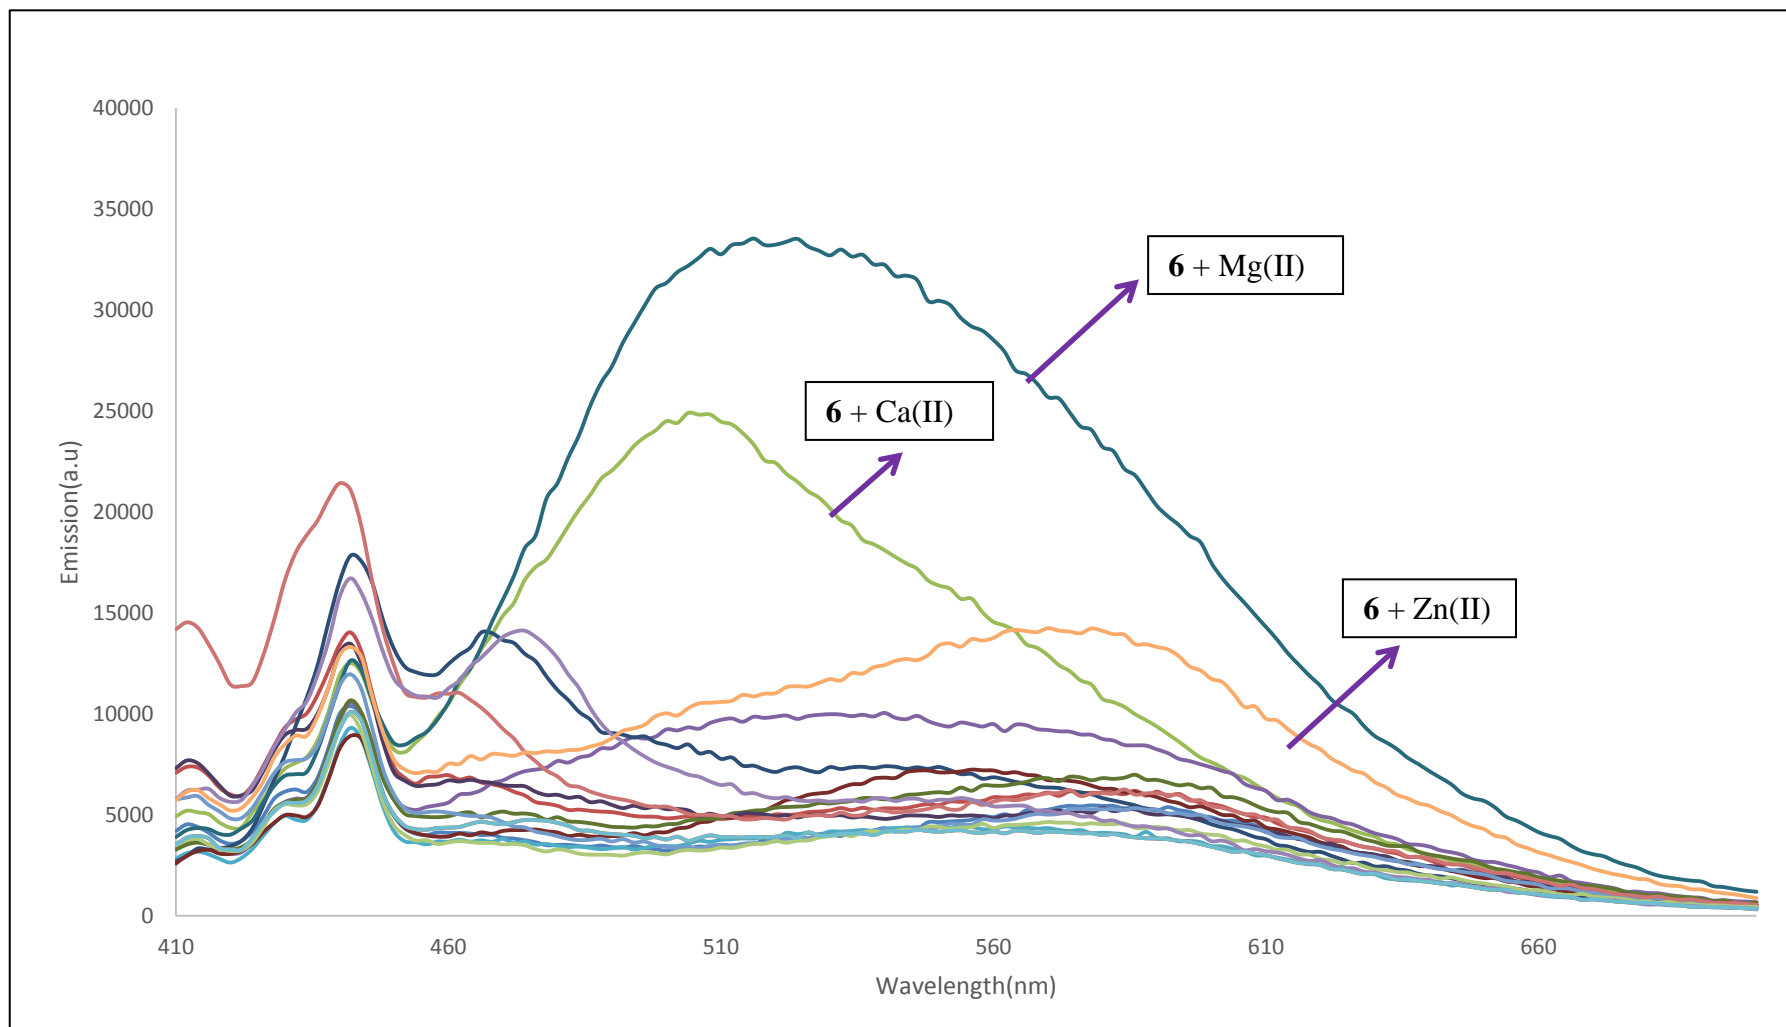

SI Fig. 19: Emission of **6** with different metal ions.  $1 \times 10^{-4}$  M of **6** in acetonitrile with two equivalents of  $M^{n+}$ . Excitation wavelength is 390 nm.

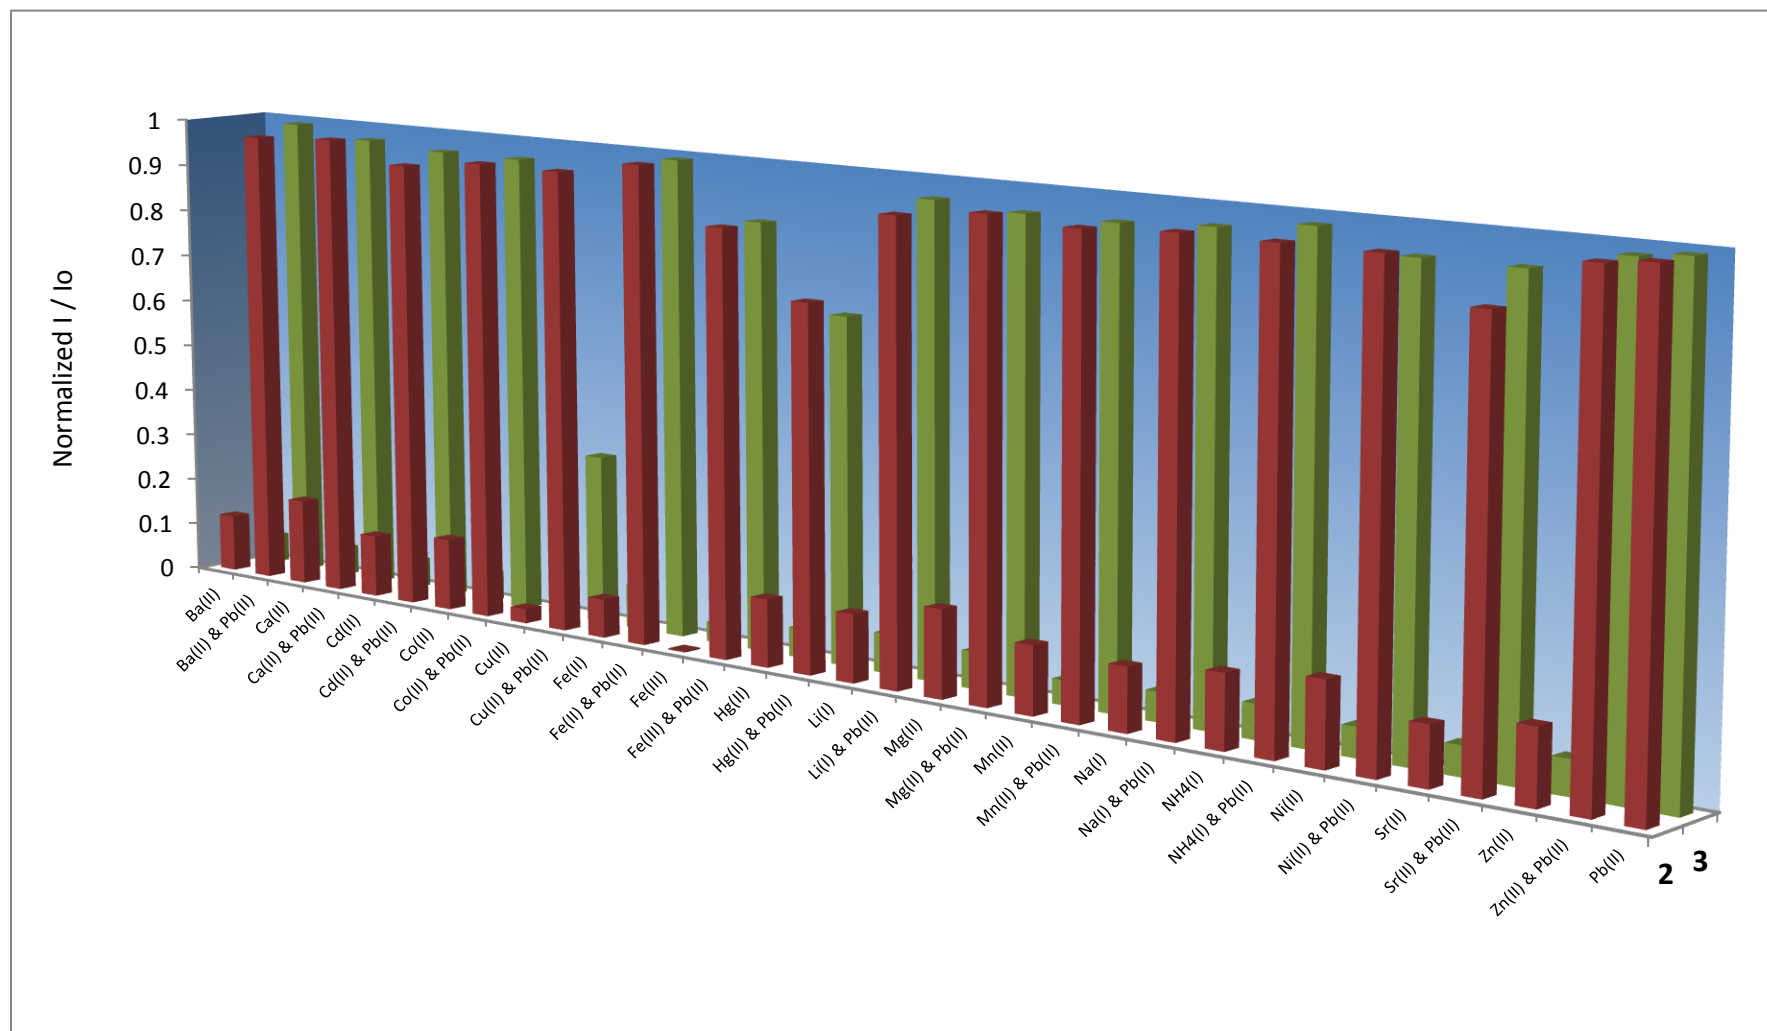

SI Fig. 20. Plot of normalized emission intensity at 520 nm of **2** and **3** in presence of different metal ions. **2** and **3** are in  $1 \times 10^{-4}$  molar concentrations with two equivalents of Pb(II) and  $M^{n+}$  in acetonitrile. Excitation wavelength is 390 nm.

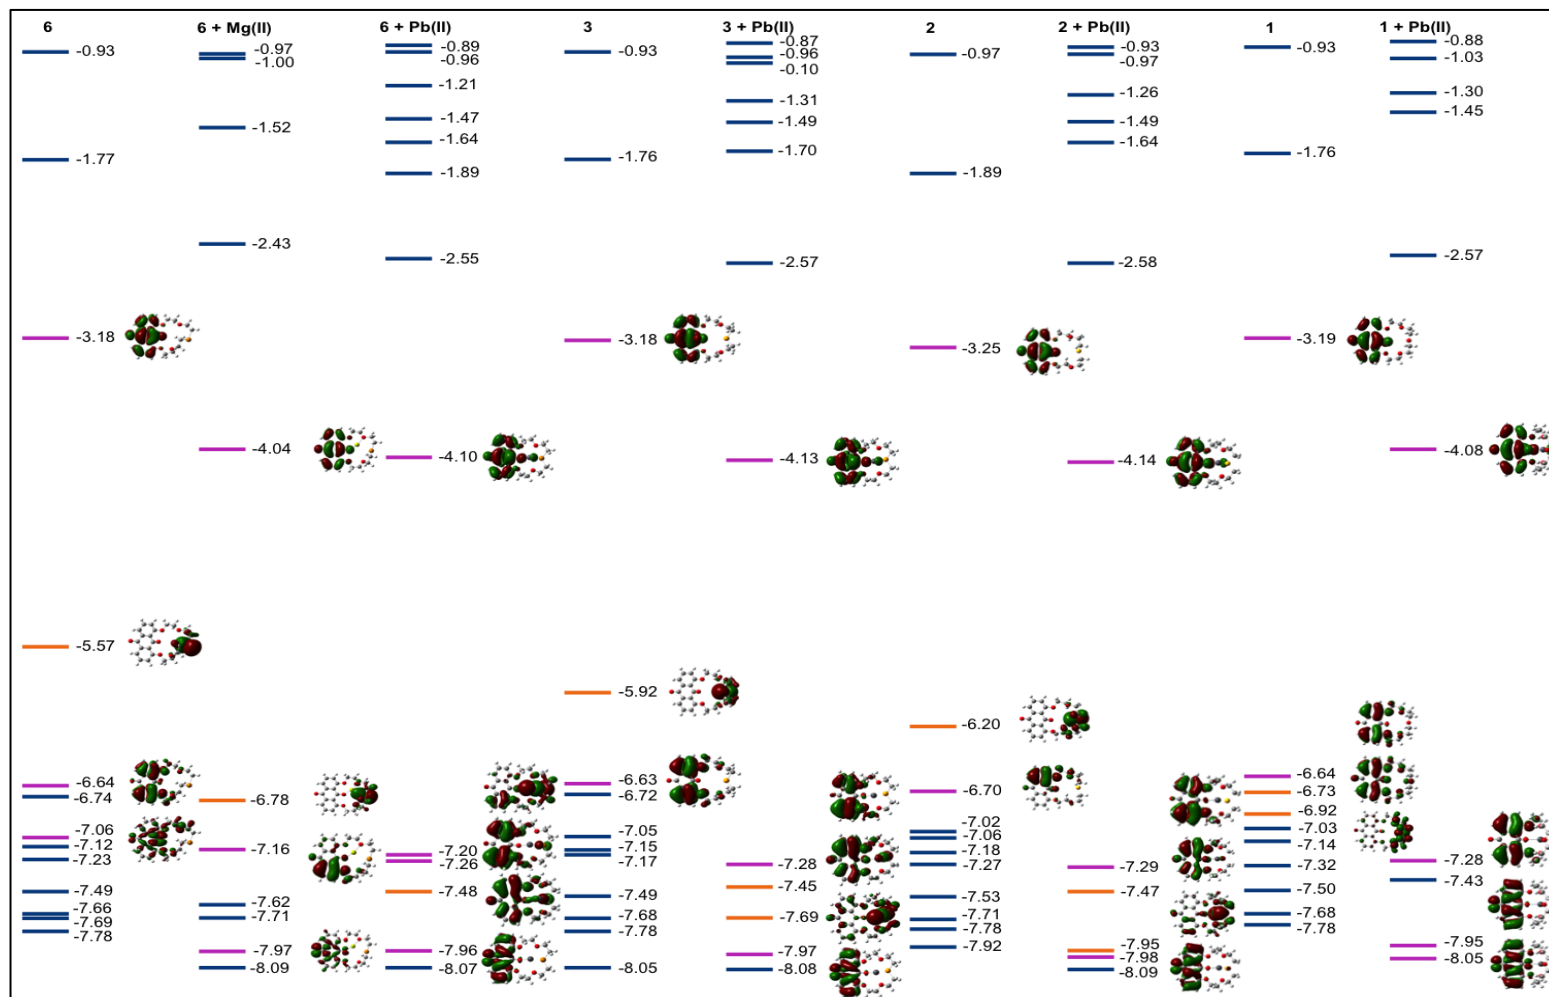

SI Fig. 21: Computationally determined molecular orbital (MO) diagram with energy values in eV. MO surfaces are only displayed for pink- and orange-labeled MOs. Pink MOs are involved in the lowest energy transition of significant oscillator strength in TDDFT calculations that correspond to absorbance peaks in the 400-550 nm range. Orange MOs are MOs near HOMO with a significant contribution from the atomic orbitals on the heteroatom.

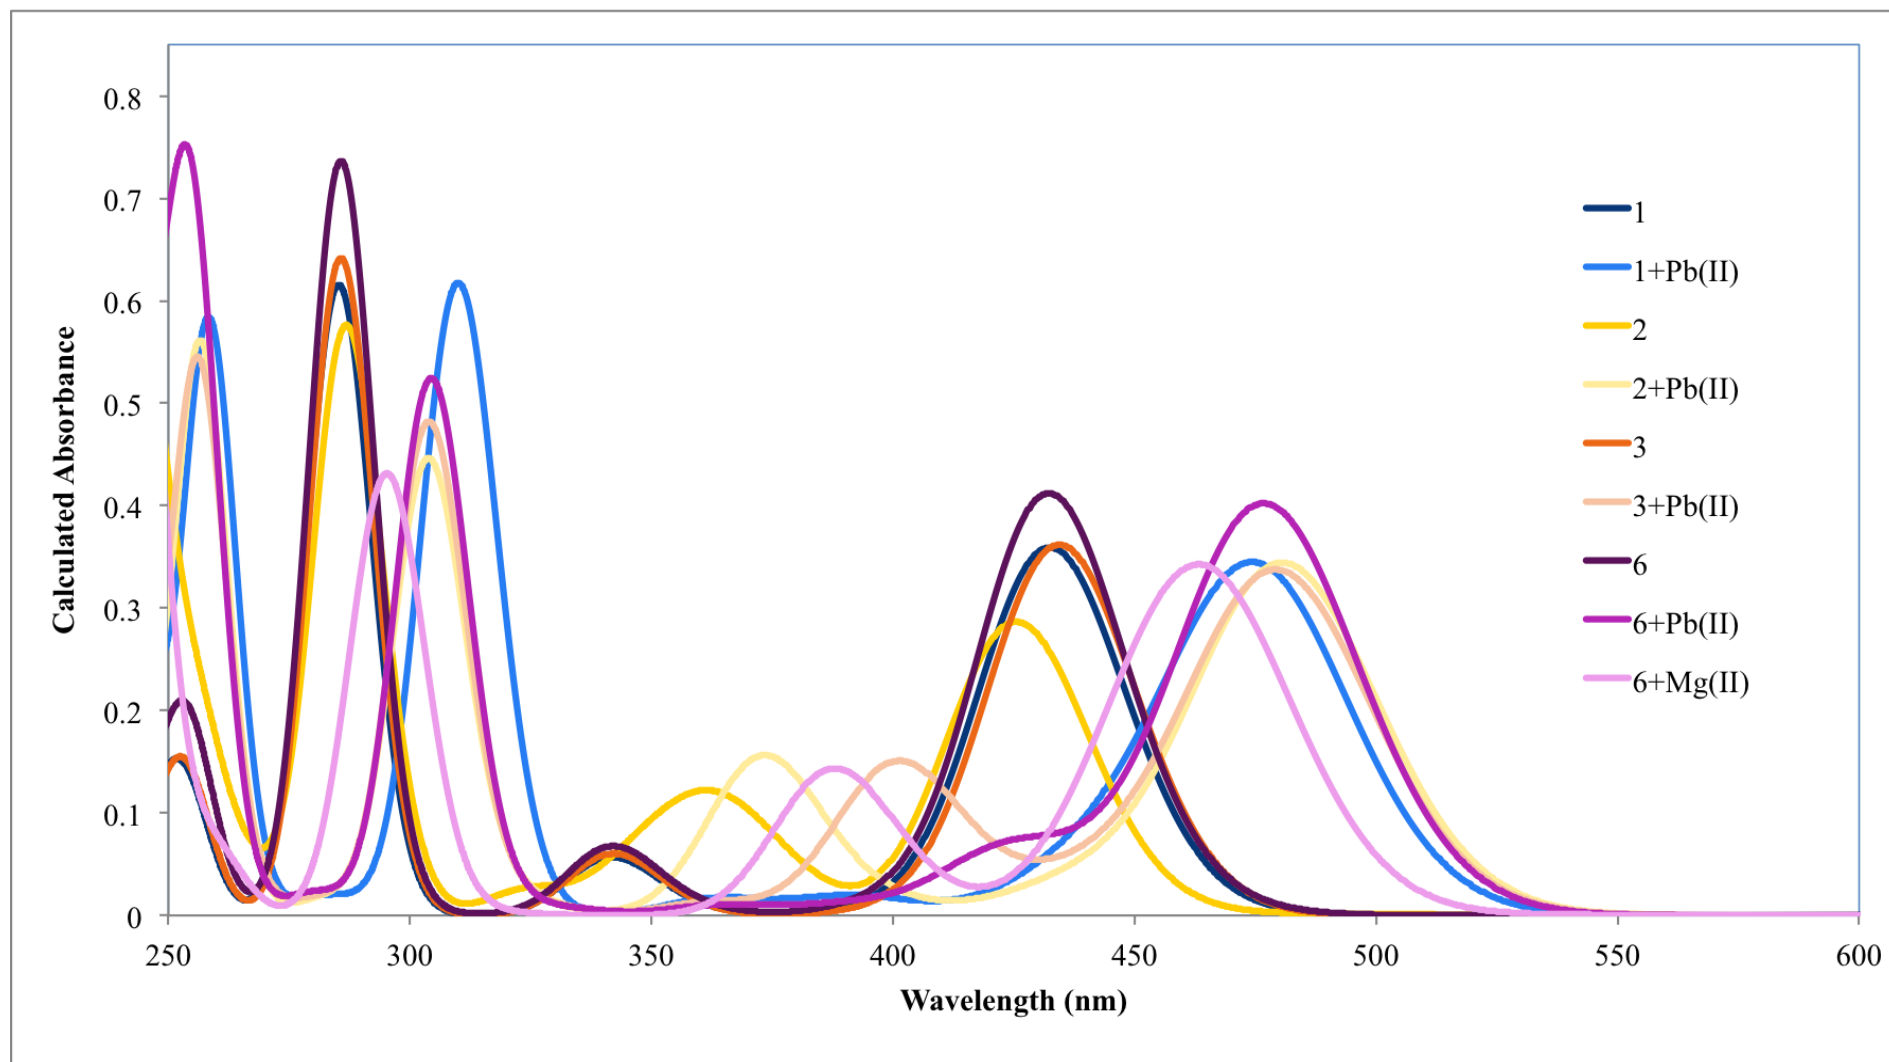

SI Fig. 22 Absorbance spectra of compounds **1,2,3,6** and their Pb(II) complexes determined by TDDFT. Acetonitrile solvent was modeled by IEFPCM.

|                   | Internal Carbonyl (cm <sup>-1</sup> ) | External Carbonyl (cm <sup>-1</sup> ) |
|-------------------|---------------------------------------|---------------------------------------|
| <b>1</b> + Pb(II) | 1535.3                                | 1592.56                               |
| <b>2</b> + Pb(II) | 1534.93                               | 1591.75                               |
| <b>3</b> + Pb(II) | 1536.81                               | 1591.38                               |
| <b>6</b> + Pb(II) | 1537.37                               | 1591.31                               |
| <b>6</b> + Mg(II) | 1563.14                               | 1588.32                               |

SI Fig. 23 Computationally determined IR stretching frequencies for the internal (inside the macrocycle) and external (outside the macrocycle) anthraquinone carbonyl groups.



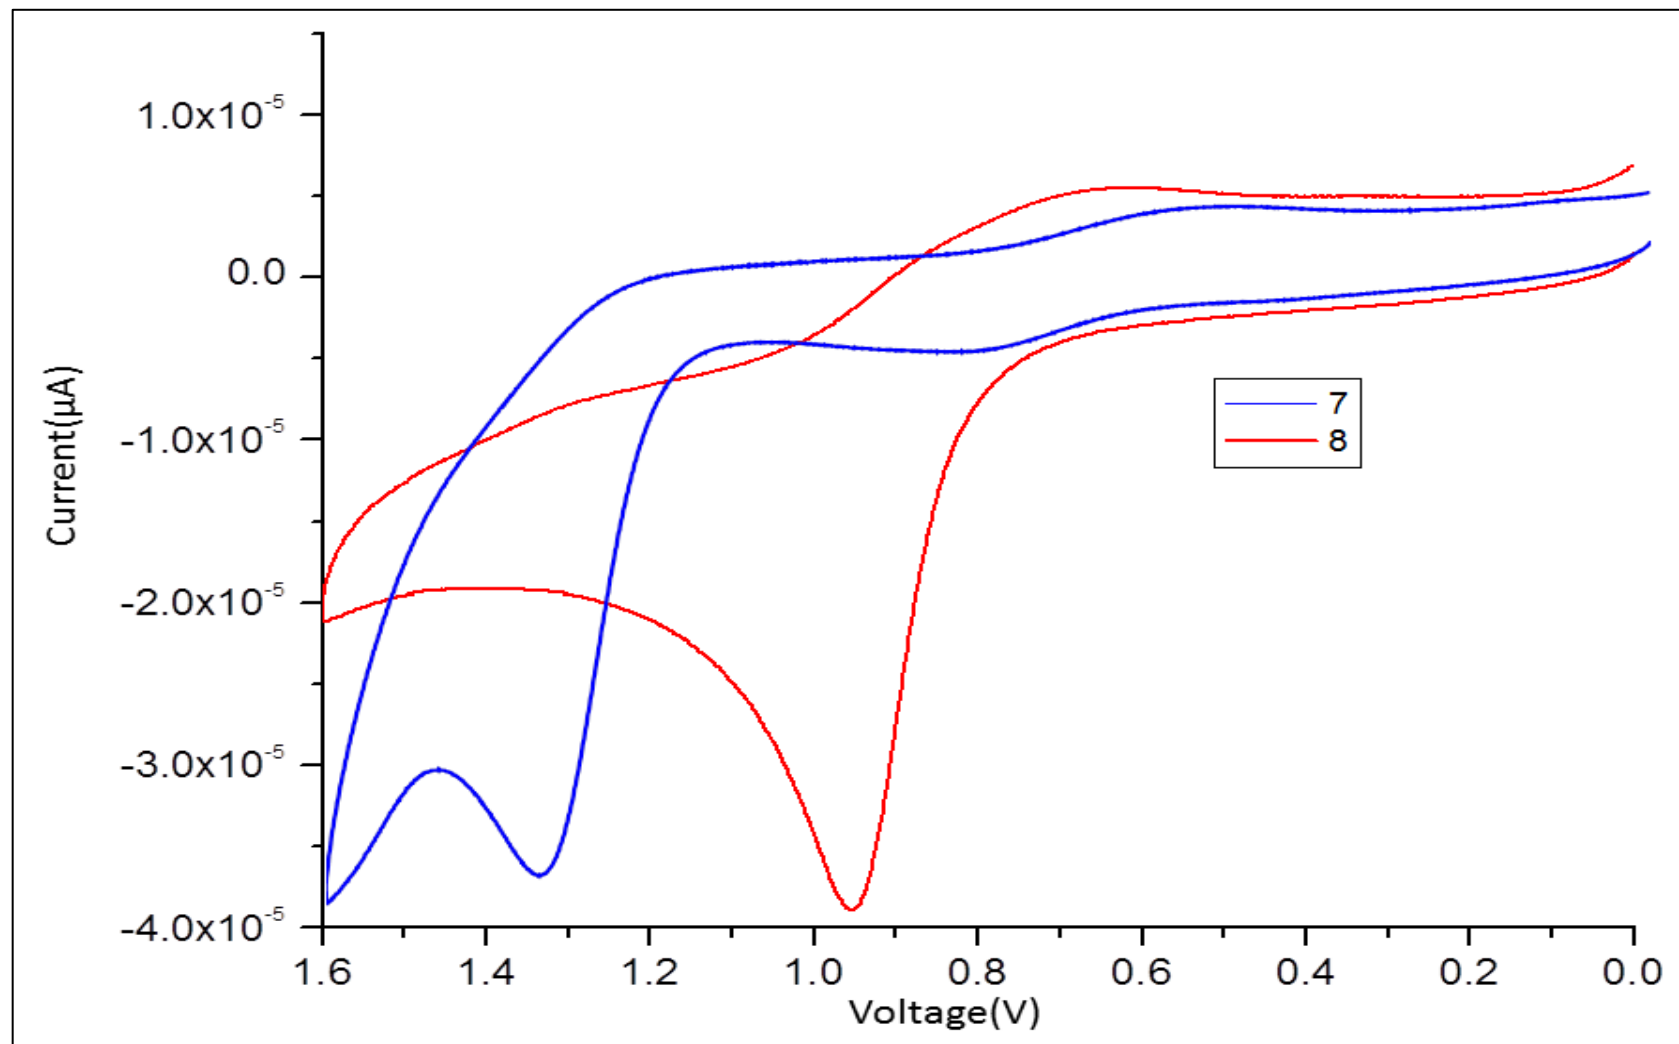

SI Fig. 24: Positive scan of compound **7** and **8** in  $\text{CH}_3\text{CN}$  using 0.1M  $\text{TBAClO}_4$  vs.  $\text{Ag}/\text{AgCl}$  on glassy carbon.

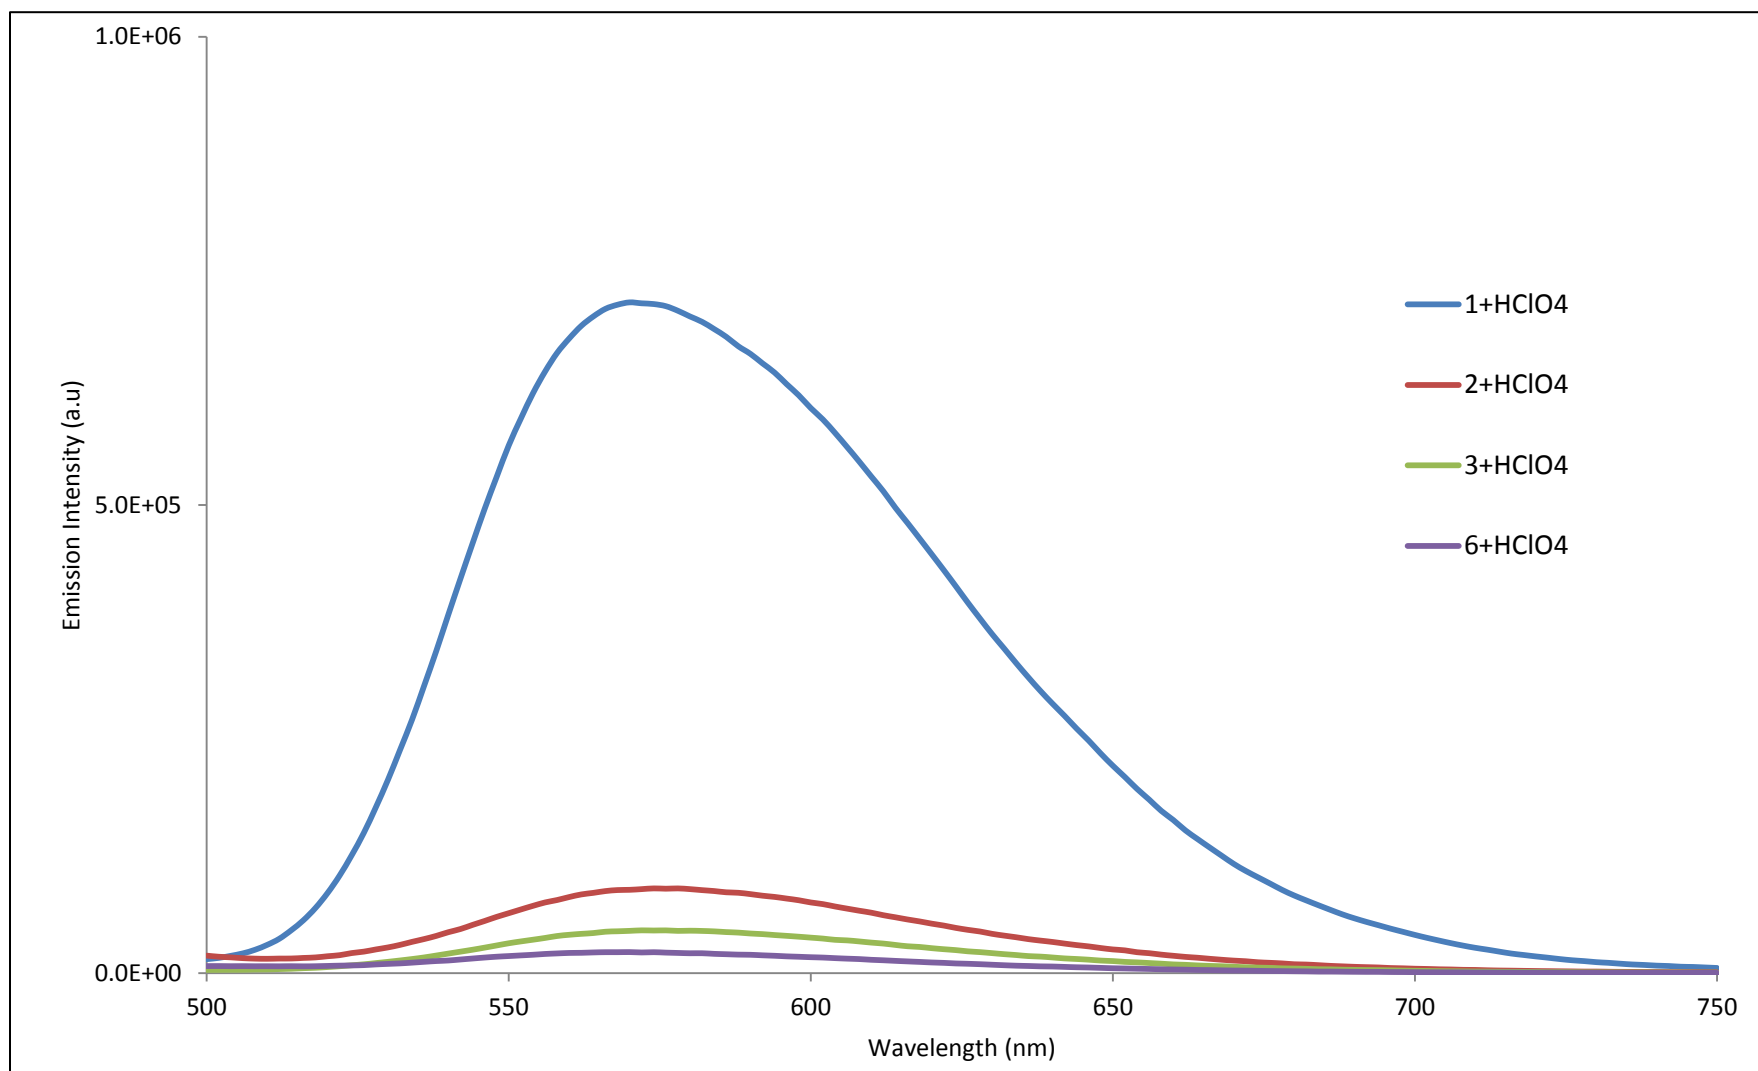

SI Fig. 25:  $.65 \times 10^{-5}$  Molar of **1**, **2**, **3** and **6** mixed with excess HClO<sub>4</sub>. The solution excited at 390 nm.



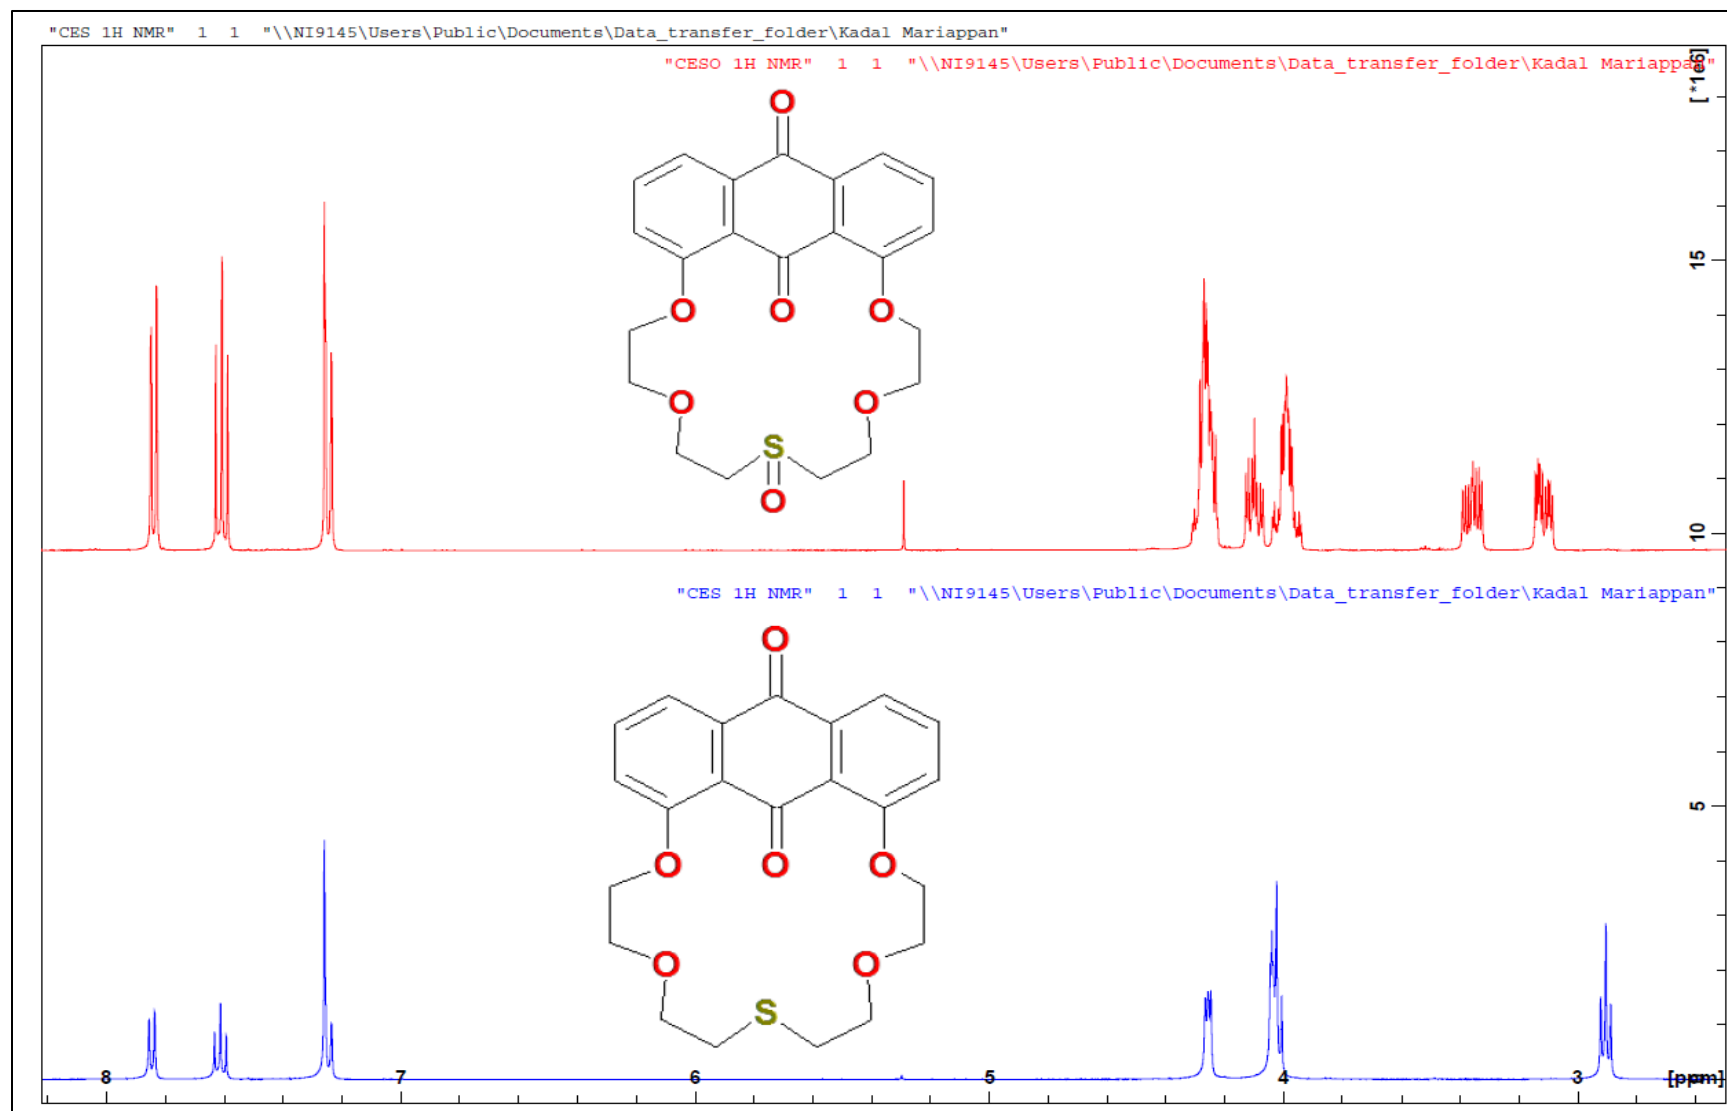

SI Fig. 27:  $^1\text{H}$  NMR comparison of **2** as sulfide and sulfoxide.
